1

2

3 Fermented food metagenomics reveals substrate-associated  
4 differences in taxonomy, health-associated- and antibiotic  
5 resistance-determinants

6

7 John Leech<sup>1,2,3</sup>, Raul Cabrera-Rubio<sup>1,2</sup>, Aaron M Walsh<sup>1</sup>, Guerrino Macori<sup>1,2</sup>, Calum J Walsh<sup>1,2</sup>, Wiley  
8 Barton<sup>1</sup>, Laura Finnegan<sup>1,2,3</sup>, Fiona Crispie<sup>1,2</sup>, Orla O`Sullivan<sup>1</sup>, Marcus J Claesson<sup>1,3</sup>, Paul D Cotter<sup>\*1,2</sup>

9

10

11 <sup>1</sup>Teagasc Food Research Centre, Moorepark, Fermoy, Cork, Ireland; email: [paul.cotter@teagasc.ie](mailto:paul.cotter@teagasc.ie)

12 <sup>2</sup>APC Microbiome Institute, University College Cork, Cork, Ireland

13 <sup>3</sup>School of Microbiology, University College Cork, Cork, Ireland

14

## 15 Abstract

16 Fermented foods have been the focus of ever greater interest as a consequence of purported health  
17 benefits. Indeed, it has been suggested that the consumption of these foods that help to address the  
18 negative consequences of ‘industrialization’ of the human gut microbiota in Western society.  
19 However, as the mechanisms via which the microbes in fermented foods improve health are not  
20 understood, it is necessary to develop an understanding of the composition and functionality of the  
21 fermented food microbiota to better harness desirable traits. Here we considerably expand the  
22 understanding of fermented food microbiomes by employing shotgun metagenomic sequencing to  
23 provide a comprehensive insight into the microbial composition, diversity and functional potential  
24 (including antimicrobial resistance, carbohydrate-degrading and health-associated gene content) of  
25 a diverse range of 58 fermented foods from artisanal producers from around the Globe. Food type,  
26 i.e., dairy-, sugar- or brine-type fermented foods, was to be the primary driver of microbial  
27 composition, with dairy foods found to have the lowest microbial diversity. From the combined  
28 dataset, 127 high quality metagenome-assembled genomes (MAGs), including 10 MAGs  
29 representing putatively novel species of *Acetobacter*, *Acidisphaera*, *Gluconobacter*, *Lactobacillus*,  
30 *Leuconostoc* and *Rouxiella*, were generated. Potential health promoting attributes were more  
31 common in fermented foods than non-fermented equivalents, with waterkefirs, sauerkrauts and  
32 kvasses containing the greatest numbers of potentially health-associated gene clusters (PHAGCs).  
33 Ultimately, this study provides the most comprehensive insight into the microbiomes of fermented  
34 foods to date, and yields novel information regarding their relative health-promoting potential.

## 35 Importance

36 Fermented foods are regaining popularity in Western society due in part to an appreciation of the  
37 potential for fermented food microbiota to positively impact on health. Many previous studies have  
38 studied fermented microbiota using classical culture-based microbiological methods, older  
39 molecular techniques or, where deeper analyses have been performed, have involved a relatively

40 small number of one specific food type. Here, we have used a state-of-the-art shotgun metagenomic  
41 approach to investigate 58 different fermented foods of different type and origin. Through this  
42 analysis, we were able to identify the differences in the microbiota across these foods, the factors  
43 that drove their microbial composition, and the relative potential functional benefits of these  
44 microbes. The information provided here will provide significant opportunities for the further  
45 optimisation of fermented food production and the harnessing of their health promoting potential.

## 46 **Introduction**

47 Fermentation is a form of food preservation with origins that can be traced back to the Neolithic  
48 age[1]. Despite recent advances in food preservation and processing, fermentation continues to be  
49 widely used as a means of preservation and is the focus of renewed interest due to increased  
50 appreciation of the organoleptic, nutritive and, especially, health promoting properties attributed to  
51 many fermented foods[2, 3].

52 Indeed, various fermented foods have been shown to have enhanced attributes relative to the  
53 corresponding raw ingredients by virtue of the microbial metabolites produced[4-8], the removal of  
54 allergens[9], other desirable biological activities[10, 11] and/or containing microbes that have the  
55 potential to confer benefits following consumption[12, 13]. Furthermore, although antibiotic use,  
56 sanitation and food processing have greatly reduced the number of deaths due to infectious  
57 diseases, these activities have also minimised our exposure to microbes and are thought to have  
58 contributed to the 'industrialisation' of the human microbiome and associated increases in chronic  
59 diseases[14, 15]. It has been suggested that fermented foods offer a means of safe microbial  
60 exposure to compensate for the absence/removal of desirable host microbes[15, 16].

61 Due to these potential benefits, and an increasing appreciation that the study of these foods provide  
62 valuable fundamental insights into simple microbial communities[17, 18], developing an even  
63 greater understanding of the microbiology of these foods has the potential to be of considerable  
64 value.

65 Advances in high throughput sequencing technology have revolutionised the study of microbial  
66 populations, including those present in foods. Although, to date, the vast majority of studies relating  
67 to fermented foods have employed amplicon sequencing to study bacterial and fungal  
68 composition[19-36], there have been some exceptional studies in which shotgun sequencing has  
69 been employed to gain a greater insight into the taxonomy and functional potential of specific

70 fermented foods[37-49]. Despite this, studies across a broad variety of such foods using this  
71 approach have been lacking to date. Here we address this issue by employing shotgun metagenomic  
72 sequencing to investigate the microbiota of broad range of, including many previously unexplored,  
73 fermented foods.

74

## 75 Results

### 76 Fermented food microbiomes can be distinguished on the basis of substrate type

77 Shotgun metagenomic sequencing of 58 food samples (347,841,507 total reads; with an average of  
78 5,997,267 reads per sample) and associated metadata (i.e., country of origin ['country'], specific  
79 source of product ['producer'], presence/absence of starter culture ['fermentation'], solid or liquid  
80 foods ['state'] and ['substrate']) (**Table 1**), revealed that the microbiomes of these foods most  
81 significantly clustered on the basis of food substrate (i.e., dairy, such as kefir and cheese; brined,  
82 such as sauerkraut and kimchi; sugar, such as kombucha and water kefir; **Table 2, Figure 1**). Ten  
83 characteristics of the food microbiome were defined and differences across these characteristics  
84 were statistically examined (**Table 2**); 4 taxonomic levels (species, genus, family and phylum), 4  
85 functional profiles (Superfocus 1,2 and 3, and Carbohydrate functions, which were a subset of  
86 Humann2 output), the bacteriocin profile and the antimicrobial resistance profile.

87 Taxonomy was the most distinguishing feature of the food substrates, as measured by the R statistic,  
88 supported by NMDS plots, PLS-DA and *L. lactis* phylogenetic tree (**Figure 1, Figure 2, Table 2**).

89 Substrate-related differences were greatest at the family-level, but were also significant at the  
90 species, genus and phylum level (**Table 2**). Further analysis was implemented at strain level.

91 Examination of *Lactococcus lactis*, the species present across the greatest number of food samples  
92 revealed that strains phylogenetically cluster according to food substrate (**Figure 1**). There was no

93 clustering of *L. lactis* strains according to any other factor. Functional analysis revealed that  
94 substrate had the most considerable impact on the functional profile of the foods (**Table 2, Figure 1**).  
95 Carbohydrate pathways most considerably differed across the food groups (**Table 2**). Indeed, of the  
96 features examined, the bacteriocin profile was the only characteristic that was not statistically  
97 different across the food substrates.

98 Three foods tested did not correspond to the three main food substrates or the corresponding  
99 microbiome clusters. Two of these were derived from soy-based fermentations, which are known for  
100 their alkaline fermentation environment[50], and the third was a coconut kefir, i.e., a dairy kefir  
101 grain based fermentation but of a coconut carbohydrate. Other fermented food types, e.g.  
102 fermented meats and fish, were not considered for this study.

103

#### 104 **Starter presence/absence, solid/liquid state and producer contribute to differences in microbiota**

105 Although less obvious from a clustering perspective, other factors such as starter presence/absence,  
106 solid/liquid state and producer, were also significant drivers of microbiome differences  
107 (**Supplementary Figure 1, Table 2**). The presence or absence of a starter culture was associated with  
108 differences in family, species, carbohydrate, genus, SF3 and the AMR profile of foods (in order of  
109 descending effect size), but to a lesser extent than substrate. Solid/liquid state was significant at  
110 three taxonomic levels and all 4 functional profiles (3 SuperFocus levels and Humann2 carbohydrate  
111 pathways), but again with a smaller effect size than substrate and starter status (**Table 2**). However,  
112 it was the only factor that was associated with significant differences across bacteriocin profiles. The  
113 specific producer of the foods was reflected by the carbohydrate related functions and species  
114 composition, but country of origin did not influence any of the factors investigated (**Table 2**).

115

## 116 **Microbial diversity differs between dairy foods and other food types**

117 Overall, 476 unique species, present at above 0.1% relative abundance, were assigned to the 58  
118 foods, whereof 301 different species were detected in brine foods, 242 in sugar foods and 70 in  
119 dairy. This corresponded to an average of 11.5, 13.5 and 6.4 different species per sample for brine,  
120 sugar and dairy foods, respectively. In line with these results, alpha diversity analyses demonstrated  
121 that the microbiomes of dairy-based fermented foods had significantly lower alpha diversity than  
122 those of either brine or sugar foods (**Figure 3**), which did not significantly differ from one another. It  
123 was also evident that, as expected, the alpha diversity of spontaneously fermented foods was  
124 significantly higher than those produced using starter cultures (**Figure 4**). Across the specific foods, a  
125 spontaneously fermented orange preserve contained the highest number of species (67), while a  
126 sample of tepache, a slightly alcoholic spontaneously fermented drink from Mexico, contained the  
127 lowest number of observed species (12).

128

## 129 **Lactic Acid Bacteria dominate Brine Foods**

130 The brine-type foods tested comprised 26 plant substrate-derived foods fermented in a saline  
131 solution. Unlike both dairy- and sugar-type fermented foods, the majority of the brine-based foods  
132 undergo a spontaneous fermentation and, therefore, rely on fermentation by autochthonous  
133 microbes[51]. Among brine-type foods, *Lactobacillus* was the most abundant genus, comprising  
134 46.8% of all reads assigned at the genus level. *Lactobacillus plantarum* was the most abundant  
135 species (9.6% relative abundance on average) followed by *L. brevis* (7.9%), *L. mucosae* (4.7%), *L.*  
136 *xianfangensis* (4.1%) and *L. sakei* (3%). *Leuconostoc mesenteroides* (4.7%) and *Pediococcus parvulus*  
137 (4.3%) were also present in significant quantities. Across the brine-type foods *Bifidobacteriaceae*  
138 were detected at a relative abundance of 1.6%. At the species level, 0.8% of species were assigned  
139 as *Bifidobacterium longum* and 0.01% to *B. breve*. No other bifidobacteria were assigned at the  
140 species level.

141

142 Several brine fermented foods were described for the first time, alongside foods that have been  
143 described before. A detailed description of these foods can be found in the supplementary material.  
144 From a functional potential perspective, 18.4% of Superfocus level 1 (SF1) functions within the brine  
145 food microbiome were predicted to relate to carbohydrate metabolism. When functional pathways  
146 were investigated at a deeper level, xylose utilisation (0.6%, SF3), fermentation (1.4%, SF2) and  
147 response osmotic stress (1%, SF2) were among the most common functionalities (**Supplementary**  
148 **Table 2**). A complete list of the relative abundances of the SuperFocus pathways, for all foods, can  
149 be found in **Supplementary Table 2**.

150

### 151 **The microbiota composition of dairy foods is more homogeneous than that of other fermented** 152 **foods**

153 Eleven dairy-type fermented foods were studied. Information supplied by the producers established  
154 that all of these foods were produced through the use of starter cultures to initiate fermentation,  
155 thus likely contributing to their reduced diversity relative to other foods [21]. *Lactococcus lactis*  
156 dominated, corresponding to, on average, 44.8% of relative abundance and was present at a relative  
157 abundance at or above 90% in 3 of the dairy foods, all of which were kefir or kefir-type foods. The  
158 next most abundant species was *Streptococcus thermophilus* (16%), followed by *S. infantarius*  
159 (5.7%), *Kluyveromyces marxianus* (3.7%), *Escherichia coli* (3.5%), *Lactococcus raffinolactis* (3%) and *L.*  
160 *mesenteroides* (2.9%). It was notable that viruses (including (pro)phage) also made up a significant  
161 portion of the dairy food microbiota (7.8%). Specific microbiomes of the various dairy fermented  
162 foods are described in the supplementary material.

163 At a functional level, carbohydrate metabolism (16.7%) was the most abundant SF1 pathway in  
164 fermented dairy. SF2 results highlighted the presence of genes with homology to those encoding



165 resistance to antibiotics and the production of toxic compounds (2.8% of the reads). Several of the  
166 most abundant SF3 pathways in dairy foods had phage related functions, including the most  
167 abundant function, i.e., phage head and packaging (3.2%).

168

### 169 **Sugar foods are dominated by *Acetobacteraceae***

170 Eighteen sugar-type fermented foods were assessed, including fermented fruit, kombucha and  
171 water kefir. Some of these foods, such as kombucha, kvass and water kefir, contained large  
172 quantities of added table sugar, whereas the substrates used for the production of fermented  
173 orange or mead, honey and water, had naturally high levels of sugar. Furthermore, while these foods  
174 were all assigned to the 'sugar foods' category (**Table 1**), they encompassed a wide variety of raw  
175 ingredients and fermentation methods, including examples of both spontaneous and starter type  
176 fermentations.

177 Sugar foods contained many species previously associated with alcohol-generating fermentations,  
178 such as *Saccharomyces eubayanus* (2.7%), *Brettanomyces bruxellensis* (5.2%), *Hanseniaspora*  
179 *valbyensis* (9.3%) and *Oenococcus oeni* (5%). Many of the other species were well-known kombucha-  
180 associated species such as *Gluconobacter oxydans* (5%), *Acetobacter cerevisiae* (2.5%) and  
181 *Komagataeibacter rhaeticus* (2%). At the species level, *Hanseniaspora valbyensis* was the most  
182 abundant (9.3% average abundance). However, this reflects very high abundance in specific  
183 instances, e.g., relative abundance in mead was 93.7%, whereas this species was not detected in 10  
184 of the other 18 sugar-type fermented foods. *Lactobacillus* was the most abundant genus (25.8%) but  
185 its abundance was lower than that found for dairy and brine foods. Within this genus, *Lactobacillus*  
186 *mali* (7.6%) and *L. plantarum* (5.3%) were the most common species. *Acetobacter* was the next most  
187 abundant genus (10.9%) and its distribution, along with other members of the *Acetobacteraceae*,  
188 made it the most abundant family (33.3%). Like brine and dairy fermented foods, the specific  
189 microbiomes of sugar foods are described in the supplementary material.

190 The most abundant SF1 function found in sugar foods was carbohydrate metabolism (14.5%).  
191 Resistance to antibiotics and toxic compounds (3.8%) and osmotic stress (1%) were the most  
192 common SF2 functions, while analysis at SF3 pathways highlighted the frequency of several  
193 pathways involved in the synthesis of amino acids such as methionine (0.79%), as well as purine  
194 (0.68%) biosynthesis.

195

### 196 **The fermented food resistome differs according to food and fermentation type**

197 Large variability in both the counts per million of antimicrobial genes (CPM) and of antimicrobial  
198 resistance (AMR) class were apparent across the different foods, with AMR profiles significantly  
199 differing across substrate and in line with the presence/absence of a starter (**Figure 4, Figure 5D,**  
200 **Table 2**). Dairy had an average of 3686 CPM per sample, brine had 426 CPM and sugar had 261  
201 CPM. However, the core and the rind of wagashi inflated the dairy results and, if these are excluded,  
202 the average CPM for dairy foods dropped considerably to 1947.

203 With respect to specific AMR classes, multi-drug resistance was most commonly assigned gene  
204 category across all three food substrates, corresponding to 2422, 293 and 133 CPMs per sample on  
205 average for dairy, brine and sugar-type foods, respectively. Betalactam resistance genes were the  
206 next most common class in dairy (718 CPM) and sugar (101 CPM) foods, while tetracycline resistance  
207 genes were the second most numerous category of AMR genes in brine (45 CPM). It was also noted  
208 that a five-fold higher abundance of AMR genes occurred in starter culture fermentations relative to  
209 spontaneous fermentations. Multi-drug resistance genes again dominated, corresponding to 1326  
210 CPM for starter cultures and 236 CPM for spontaneous fermentations. Betalactam resistance genes  
211 were the next highest in foods containing starter cultures (428 CPM), whereas tetracycline  
212 resistance genes were next highest in spontaneously fermented foods (48 CPM). The high CPMs for  
213 both dairy and starter containing foods is consistent with the fact that dairy foods were those for  
214 which starters were most extensively used. When gene distribution was investigated from the

215 perspective of specific food substrates, the wagashi cheese rind was found to have the highest CPM,  
216 i.e., 17381, with tempeh being next highest with 5657 CPM. AMR genes counts in kombucha and  
217 water kefir were generally low, and no known AMR genes were identified 9 of the 58 foods, i.e., 1  
218 kombucha, 2 water kefir, 3 kimchi, 1 pickled carrot, 1 pickled vegetable and 1 apple cider vinegar.  
219 Of the 9 fermented foods for which no AMR genes were assigned, 4 were sugar-type (including 2  
220 water kefir) and 5 were brine-type (including 3 kimchis). It was notable that very few AMR genes  
221 were assigned in the 2 other kimchis studied (<42 CPM) while across the 5 other water kefir samples,  
222 3 contained very few AMR genes (<6 CPM) but 2 had relatively high counts (>1000 CPM). Across the  
223 two samples of Kombucha, 1 did not contain assigned AMR genes while the other contained 1.6  
224 CPM.

225 To provide context, the frequency with which AMR genes are detected in fermented foods was  
226 compared with that across human stool samples for comparative purposes (**Figure 5D**). Human gut  
227 samples (29 random stool samples from the Human Gut Microbiome Project[52]) had significantly  
228 more AMR CPMs than fermented foods ( $p > 0.01$ ) with the exception of 8 fermented foods. These 8  
229 foods were the 2 wagashi cheese samples, tempeh, fermented ginger, 3 milk kefir and labne. Of  
230 these 8 foods, 6 were dairy, and 7 were starter-generated foods. A further 12 foods had similar CPM  
231 of AMR genes, while 38 foods had lower AMR CPMs, when compared with the human samples.

232

233 **The presence of putative health promoting genes differs markedly across fermented foods but**  
234 **exceeds that of non-fermented foods**

235 Bacteriocins are ribosomally synthesised antimicrobial peptides, many producers of which have been  
236 sourced from fermented foods. The bacteriocin-producing potential across the 58 fermented food  
237 samples was investigated, with 55 putative bacteriocin-encoding gene clusters being assigned across  
238 54 of the foods (no gene clusters identified in 4 samples (**Supplementary Table 3**)). Zoocin A- and  
239 enterolysin A-like gene clusters were highly abundant across all 3 fermented food substrates.

240 Clusters corresponding to another bacteriolysin subclass, the helveticin J-like proteins were more  
241 frequently detected in dairy and sugar-type foods than in brine-type foods (**Fig 3B**). Carocin A- and  
242 colicin A-like clusters had a high abundance in brine and sugar, but not dairy, foods. As noted above,  
243 there was a significant difference in the distribution of bacteriocins between solid and liquid food  
244 types (**Table 2**), with liquid foods having a higher relative abundance of helveticin J Propioncin F-like  
245 and pediocin clusters and solid foods having more carnocin CP52-like and microsin 24-like clusters.  
246 Examining the pediocin sequences in more detail, homology with *pedA* and *pedB* was discovered.

247 Given that bacteriocin production is regarded as a probiotic trait, these findings prompted an  
248 investigation of other potentially health-associated gene clusters (PHAGCs) within these fermented  
249 food microbiomes. PHAGCs were divided into 3 broad categories. Gene clusters binned as “survival”  
250 are genes that were shown to be important for surviving the low pH of the stomach or the bile salts  
251 of the small intestine [53]. Gene clusters binned as “colonisation” are genes which were shown to be  
252 vital for colonising the gut microbiome. These included genes responsible for surface proteins and  
253 exopolysaccharide production. “Modulation” gene clusters were all of the other potentially health  
254 promoting gene clusters that did not fit the previous two bins. These genes were shown to affect the  
255 host phenotype in other ways, such as stimulating the host immune system in the case of D  
256 phenyllactic acid [13] or the production of  $\gamma$  aminobutyric acid (GABA) [54, 55]. The majority of these  
257 PHAGCs genes are based on studies reviewed in [53]. Shotgun metagenomic data from non-  
258 fermented foods, i.e., unpasteurized whole milk, pasteurized skimmed milk and milk powder, was  
259 used for comparative purposes. In general, the fermented foods contained considerably more  
260 PHAGCs than the non-fermented substrates. Among the fermented foods, a larger number of  
261 PHAGCs were found in brine- and sugar-foods than in dairy foods, with several water kefir,  
262 sauerkrauts, beet kvasses and one kombucha being the foods with highest levels of PHAGCs (**Figure**  
263 **6**). With respect to the individual PHAGC sub-categories, all fermented foods contained more  
264 colonisation-type PHAGCs than the non-fermented controls. In the case of the modulation and

265 survival clusters, the number of PHAGCs in some fermented foods, such as scallion kimchi, labne,  
266 agousha and mead, were no greater than those in the non-fermented foods.

267

### 268 **Metagenomic assembly reveals 10 putative new species**

269 Metagenome assembled genomes (MAGs) were assembled from the reads and quality checked. 443  
270 MAGs were assembled in total, with 127 genomes above 80% completeness and having less than  
271 10% contamination (**Figure 7**). TraitAr[56] was used to predict the growth phenotypes of the 127  
272 MAGs. The outputs were concatenated into a single output for each food substrate (**Figure 7**) and  
273 provided intuitive results, such as a high correlation between lactose utilisation and dairy foods and  
274 high glucose oxidation potential in sugar food microbiomes. Consilience between the TraitAr and  
275 taxonomic output is supported by the abundance of *Lactococcus lactis* in dairy and brine samples.  
276 FastANI[57] was used to assign taxonomy and to assess novelty and established that 10 of these  
277 MAGs had <95% identity to known NCBI prokaryote genomes. 7 of these novel MAGs are acetic acid  
278 bacteria, 2 are lactic acid bacteria and 1 belongs to the family *Enterobacteriales* (**Table 3**). The  
279 highest identity match for 3 of the novel MAGs was *Acidisphaera rubrifaciens*. All 3 of these MAGs  
280 came from water kefir. The 4 remaining acetic acid bacteria were best matched with *Acetobacter*  
281 *aceti* (MAG from water kefir), *Gluconobacter cerinus* (MAG from bread kvass) and *Acetobacter*  
282 *malorum* (MAGs from rostagroèkport vorožnyj and apple cider vinegar). The two novel LABs were  
283 best matched with *Leuconostoc gelidium* (sauerkraut MAG) and *Lactobacillus kimchiensis* (boza  
284 MAG). The final novel MAG, from the water kefir microbiome, most closely resembled *Rouxiiella*  
285 *chamberiensis*.

286

## 287 Discussion

288 The practice of fermenting foods can be traced back over many millennia[58]. Recently, shifts in  
289 consumer preference have resulted in a renewed interest in fermented foods, with the associated  
290 global market estimated to reach \$40 billion USD by 2024[59]. The development of a better  
291 understanding of the microbial composition and functional potential of these foods provides an  
292 insight into features that are common among, and different between, fermented foods and  
293 ascertain potential roles of individual species, including novel species and strains. Importantly, the  
294 taxonomic resolution of shotgun metagenomics allows strain level identification of the microbiome  
295 but also facilitates an assessment of functional profile, bacteriocin and AMR gene distribution,  
296 determination of PHAGCs, the assembly MAGs and the determination of predicted phenotypes.

297 Fermentation substrate is the strongest driver of the composition and functional potential of the  
298 microbiomes of fermented foods. The type of nutrients available to the microbes determined the  
299 diversity within each food to the greatest extent. The biggest effect of substrate was found between  
300 the families present in each food substrate, with *Lactobacillaceae* (LDA = 5.68) most persistent in  
301 brine foods, *Streptococcaceae* (LDA = 5.92) in dairy foods and *Acetobacteraceae* (LDA = 5.5) in sugar  
302 based foods (**Supplementary Figure 2**). The different substrates impose functional requirements on  
303 the microbes, such as a necessity for osmotic stress tolerance in both brine and sugar-type foods.  
304 Other factors, such as the presence or absence of a starter culture, also contributed to differences.  
305 Starter culture foods had the lowest alpha diversity, likely a result of adding a community of  
306 specialist microbes to the food, which would outcompete any autochthonous microbes less adapted  
307 to such an environment. Two kefir samples made from the same starter, but using raw or  
308 pasteurized milk, respectively, highlight this point. Although we do not have data on the pre-  
309 fermented milk, the raw milk likely contained its own unique consortium compared to the relatively  
310 low bacterial load of the pasteurised sample. After 48 hours of fermentation, both samples had

311 almost identical microbial composition. The small differences may be due to carry over differences in  
312 the microbiota of the substrates, the stochastic differences between any two fermented samples  
313 and species falling below the 0.1% abundance threshold for inclusion (hence the appearance of 5  
314 unique species between the 2 samples). Interestingly, *P. helleri* was found at 3% in the pasteurised  
315 sample (not at all in the unpasteurised), having been isolated from raw milk in previous studies[60].  
316 The differences in diversity between solid and liquid foods is possibly due to the selective pressures  
317 of mobility, nutrient availability (in a homogenous liquid compared to a less homogenous solid food)  
318 and moisture content in solid foods compared to liquid foods. The observed differences in diversity  
319 due to producer are more difficult to explain, but unrecorded factors such as individual fermentation  
320 practises or cross contamination of foods or from the processing environment may be the cause of  
321 these differences. Country of origin was not significant for any characteristic examined, possibly due  
322 to the cosmopolitan nature of all of the fermenting microbes. Outside of composition and top-level  
323 functionalities, other traits did vary in line with other categories, in that bacteriocin gene cluster  
324 profile differed significantly across solid and liquid foods, and AMR-encoding genes differed across  
325 food substrate and between spontaneous and starter-type fermentations. It is unclear as to why  
326 bacteriocin gene clusters differed across solid and liquid foods, but perhaps the matrices of solid  
327 foods require different ecological tools for competitive advantage than liquid substrates.

328 Analysis revealed that the microbiomes of starter culture-type fermentations contain more assigned  
329 AMR-associated genes. However, this difference could represent the more extensive  
330 characterisation of starter culture microbes, and their associated genomes and AMR profiles, leading  
331 to better assignment of AMR genes from starter cultures strains than those involved in spontaneous  
332 fermentations. Comparing with human gut metagenomes, the majority of the fermented foods had  
333 a lower AMR CPM. Of the 8 foods with higher AMR CPM, only 3 foods stood out as having  
334 considerably higher CPMs, 2 were subsamples of the same food, i.e. wagashi cheese. In contrast,  
335 kimchi and kombucha samples were notable by virtue of either lacking detectable AMR genes or  
336 having very low CPMs. Kimchi shared many taxa with other brine-type foods so the differences

337 observed may reflect strain level differences. Metagenomic sequencing of a larger collection of  
338 these fermented foods, coupled with antibiotic resistance assessments of isolated strains, will be  
339 necessary to determine how representative these results are.

340 Bacteriocin production is regarded as a probiotic trait. These peptides and, in the case of  
341 bacteriolysins, proteins, are thought to be produced by bacteria to gain a competitive advantage  
342 over other taxa, typically those occupying the same environmental niche. Bacteriocin production can  
343 contribute to the quality and safety of foods through the removal of spoilage and pathogenic  
344 bacteria, but bacteriocin production *in situ* in the gut can also enable the producing bacteria to  
345 become established, compete against undesirable taxa and contribute to host-microbe dialogue[61,  
346 62]. The bacteriocin profile did not differ according to food substrate, with zoocin A- and enterolysin  
347 A-like genes being most abundant across all food substrates. However, the bacteriocin-associated  
348 genes present in solid and liquid foods differed significantly from one another in that liquid foods  
349 were enriched with pediocin-like genes. After a further analysis of the pediocin sequences,  
350 homology with *pedA* and *pedB*, required for production of to pediocin Ach/PA-1, was apparent.  
351 These bacteriocins are best known for their strong antilisterial effects[63]. Pediocin Ach/PA-1 has  
352 also been shown to be active against enterococci and staphylococci[64], and the presence of these  
353 genes potentially adds to the safety of these foods, and their potential to be health promoting. Solid  
354 foods had a higher abundance of carnocin CP52-like bacteriocins, which are known for activity  
355 against *Listeria* and *Enterococcus*, again potentially adding to the safety of these foods[65].

356 Across a broader range of PHAGCs, it was apparent that these gene clusters were more common in  
357 fermented, than non-fermented, foods. Sugar and brine foods were found to contain the highest  
358 levels of PHAGCs. Microbes in sugar-type food microbes generally must persist in low pH  
359 environments, with some kombucha fermentations dropping to as low as pH 3[66]. In contrast,  
360 although also somewhat acidic, a milk kefir fermentation is regarded as complete when the pH  
361 reaches 4.5[67], while the pH of most cheeses is between pH 5.1 and 5.9. Many of the sugar foods



362 also contained colonisation-associated PHAGCs. It was also noted that brine-type foods had the  
363 highest abundance of *Lactobacillaceae*, specific representatives of which have been exploited for  
364 their probiotic activity. A combination of these various factors likely contributes to the higher  
365 abundance of PHAGCs in both of these foods relative to dairy foods. However, even within the  
366 respective food substrate groups, the PHAGCs present varied considerably, with foods such as water  
367 kefir, sauerkrauts, pickled veg, ginger, kvass and kombucha being enriched in PHAGCs. These foods  
368 all contained colonisation and survival PHAGCs at a higher frequency, e.g., glycotransferases for  
369 colonisation in kombucha and pickled veg, and bile salt metabolism genes in water kefir and  
370 fermented sliced ginger. D-lactate dehydrogenase pathways were consistently identified in these  
371 foods but were absent from other such as scallion kimchi, carrot sticks and agousha. This  
372 observation is notable as D-lactate dehydrogenase is the enzyme responsible for producing D-  
373 phenyllactic acid (D-PLA), a metabolite known to modulate the host immune system[13]. Glutamate  
374 decarboxylase, which converts glutamate into gamma-aminobutyric acid (GABA), was present in  
375 some (kombucha, kvass, coconut kefir and some water kefir samples), but not all, PHAGC-enriched  
376 foods. GABA is a well-known modulator of mood[68], while this enzymatic reaction also consumes  
377 protons and thus contributes to acid resistance[69]. Although *in vivo* studies are required to directly  
378 examine the health benefits of specific fermented foods, these insights can undoubtedly help to  
379 identify foods, and strains, that are more likely to be health promoting, facilitate the production of  
380 fermented foods optimised for health promotion and direct the experimental design of human  
381 intervention studies.

382 Finally, this study discovered 127 high quality MAGs, of which 10 are putative novel species. 3  
383 putative new *Acetobacter* species from water kefir, milk kefir and sauerkraut, a *Gluconobacter* from  
384 bread kvass, a *Leuconostoc* from sauerkraut and a *Lactobacillus* from boza were assembled from the  
385 shotgun data. While these species are apparently novel, the corresponding genera are found in  
386 fermented foods at a high frequency. However, 2 MAGs representing genera that have not been  
387 found in fermented foods before were assembled, i.e., a *Rouxiiella* species and 3 *Acidisphaera*

388 species, all from water kefir samples. *Rouxiella chamberiensis* and *Acidisphaera rubrifaciens* are the  
389 only previously known members of their respective genera. *Rouxiella chamberiensis* was isolated  
390 from parenteral nutrition bags and has been shown to ferment D-glucose but not sucrose[70] and  
391 *Acidisphaera rubrifaciens* has been found in acidic hot springs and mine drainage systems and, like  
392 many of the other sugar taxa, is acidophilic[71]. The assembly of these and other MAGs in the future  
393 will contribute towards the building of fermented food, and other food, microbe databases,  
394 equivalent to those available for the more complex human gut microbiome[72] , to enable the more  
395 accurate and rapid identification of food microbes. Such databases will be key in the application of  
396 metagenomics-based approaches on a widespread basis by the food industry.

397 Overall, this study combines many novel insights into fermented food microbiomes. Firstly, the  
398 taxonomic composition of the 58 foods has been described, including many foods that have not  
399 been described using NGS previously. Secondly, the functional profile of these foods has been  
400 characterised, and like the taxonomic profile, highlights the differences between starting material  
401 and microbial composition. Importantly, given the current interest in fermented foods as a healthy  
402 food choice and the role diet plays in modulating the gutmicrobiome, the health promoting potential  
403 of the microbes in these various foods has been explored. Finally, genomes, including potentially  
404 novel taxa, were assembled from these foods, and will contribute to the better assignment of reads  
405 from fermented food, and indeed broader food chain microbiome studies, in the future.

## 406 Methods

407 58 samples of fermented foods were collected from various artisanal producers (see Table 1). 5g of  
408 solid foods were placed in a stomacher bag. 50ml of sterile MRD was added to the bag. The contents  
409 were homogenised in a stomacher (BagMixer 400 from Interscience) for 20 minutes. After this step,  
410 both solid and liquid foods were extracted using the same method. 50ml of the homogenised  
411 solution was centrifuged at 10,000 rpm, at room temperature, for 10 minutes. The supernatant was  
412 discarded. The pellet was resuspended in 550µl of SL buffer in a 2ml tube (SL buffer from GeneAll kit

413 below). 33µl of Proteinase K was added to the tube and incubated at 55°C for 30 minutes. The  
414 solution was then transferred to a bead beating tube and placed in a Qiagen Tissue lyser 2 for 10  
415 minutes at 20/s. The GeneAll Exgene extraction protocol from step 4 was then followed until the  
416 final elution step, where 30µl of elution buffer (EB) was used here instead of the 50µl suggested in  
417 the protocol.

## 418 **Sequencing**

419 Library prep was carried out as per Illumina Nextera XT protocol (Illumina) [73]. DNA was quantified  
420 using a Qubit High Sensitivity dsDNA assay. Final library quality was assessed by running on an  
421 Agilent High Sensitivity DNA chip, and quantification by qPCR using the KAPA Library Quantification  
422 Kit for Illumina (Roche). Sequencing was carried out on the NextSeq500 using a 300 cycle High  
423 Output v2 kit.

## 424 **Bioinformatics**

425 All raw reads can be accessed from the ENA under the project accession number PRJEB35321.  
426 347,841,507 reads were obtained from the Nextseq sequencing run in the form of Bcl files, which  
427 were converted to fastq format using bcl2fastq software. Quality trimming was performed using the  
428 trimBWastyle.usingBAM.pl script. Using Picard (<https://github.com/broadinstitute/picard>), fastq  
429 was converted to Sam format. Picard was also used to remove duplicates. The sequences were then  
430 quality checked and trimmed using the trimBWastyle.usingBam.pl script from the Bioinformatics  
431 Core at UC Davis Genome Center  
432 (<https://github.com/genome/genome/blob/master/lib/perl/Genome/Site/TGI/Hmp/HmpSraProcess>  
433 /trimBWastyle.usingBam.pl). Forward and reverse reads were then combined into a single fasta file  
434 for each sample using the fq2fa command from IDBA-UD [74].  
435 Kaiju [75] was used to assign taxonomy to the reads, discarding taxa with relative abundance of less  
436 than 0.1%. This setting was chosen as other studies have shown a high false positive discovery rate

437 below this threshold [76]. Superfocus [77] was used to assign functionality to the reads. All  
438 percentages reported at all taxonomic levels are percentages of the assigned reads only.  
439 **Supplementary Table 1** shows the complete list of microbes and their relative abundance for each  
440 food. The phylogenetic tree of *L. lactis* was created in GraPhlAn [78], using the StrainPhlAn [79]  
441 output, which used Metaphlan2 [80] taxonomic assignment.

442 Statistical analyses was carried out in R-3.2.2[81] using vegan [82]. Anosim analysis was carried out  
443 between each metadata category containing 6 or more samples (**Supplementary table 4**).

444 Benjamini-Hochberg false discovery rate was applied to the anosim results. The linear discriminant  
445 analysis (LDA) effect size (LEfSe) [83] method was used to determine if any taxa or pathways were  
446 differentially abundant between groups.

#### 447 **Antimicrobial Resistance**

448 Antimicrobial resistome analysis was performed by aligning paired-end metagenomes reads against  
449 the MEGAs database (v. 1.0.1) [84]. To reduce Type I errors, this database was first manually  
450 curated to remove any genes corresponding to antimicrobial resistance arising from point  
451 mutations. The alignment was performed using the --very-sensitive-local preset of Bowtie2 (v. 2.3.4).  
452 The Resistome Analyser tool (<https://github.com/cdeanj/resistomeanalyzer>) was used to format the  
453 output and the results were normalised for sequencing depth across samples as copies per million  
454 reads (CPM).

#### 455 **Bacteriocin Assignment**

456 Bacteriocin assignment was performed with the BLAST analysis of the bacteriocin genome mining  
457 tool (BAGEL) of the predicted genes with the Prodigal tool against the BAGEL4 bacteriocin databases  
458 [85].

#### 459 **Carbohydrate pathways**

460 The carbohydrate function was assigned to reads with the HUMAnN2 pipeline [86], which assigned  
461 the function based on the ChocoPhlan databases and genes based on UniRef [87]. To further simplify  
462 the exploration of the abundance data of the gene family were grouped into the functional category  
463 Gene Ontology (GO), specifically carbohydrate-related functions, performing a more in-depth  
464 analysis.

#### 465 **Metagenomic Assembled Genomes**

466 Metagenome assembly was carried out using IDBA-UD. MetaBAT 2 [88] was used for genome  
467 binning, with default settings. CheckM [89] was implemented to check the quality of metagenome  
468 assembled genomes (MAGs). Low quality MAGs, i.e. <80% completeness and/or >10%  
469 contamination, were removed from downstream analysis. Kaiju [90] and PhyloPhlAn [91] were used  
470 to assign taxonomy to the MAGs. The average nucleotide identity (ANI) of MAGs to reference  
471 genomes, which were downloaded from RefSeq [92], was calculated using FastANI [57]. Putatively  
472 novel MAGs were assigned as potentially new species using the same ANI threshold as [72]. The  
473 phenotypes of MAGs were predicted using Traitar [56]. MAGs were annotated using Prokka [93].

474

#### 475 **PLS-DA analyses**

476 Partial least squares discriminant analysis (PLS-DA) plots were generated using the KODAMA R  
477 package (version 1.5) [94]. Default parameters of the KODAMA software were used on species from  
478 the taxonomic profile with the semi-supervised constraining of data ordination according to the  
479 fermentation process of samples. The final visualisation of data was performed in R (version 3.5.1)  
480 using ggplot2 (version 3.1.1) [95].

## 481 PHAGC screening

482 Shotgun sequences for 16 non-fermented dairy samples were downloaded from ENA (study  
483 accession number PRJEB31110) with a median of 18041 reads per sample, after removing *Bos taurus*  
484 reads. The 16 dairy samples were; raw tanker milk X 2, skimmed milk powder x 6, pasteurized  
485 skimmed milk x 4 and raw silo whole milk x 4. The fermented and non-fermented food sequences  
486 were then assigned Uniref90 clusters using the Humann2 software[86]. Using the Uniref90 clusters  
487 obtained from Humann2 output, the presence or absence of clusters that have been shown to  
488 influence potential health promoting properties of bacteria was determined[13, 53, 96]. The list of  
489 search terms can be found in **Supplementary table 5**. The total number of PHAGCs present in each  
490 food were binned into one of the following 3 categories; survival, modulation and colonisation. The  
491 heatmap was created using Pheatmap[97]. The rows of the heatmap were scaled, so that the values  
492 are comparative between the foods, and not an absolute count of the number of gene clusters  
493 found in each food.

## 494 Acknowledgements

495 The authors thank the fermented food producers for kindly supplying the samples. This research was  
496 conducted with the financial support of Science Foundation Ireland (SFI) under Grant Number  
497 SFI/12/RC/2273.

## 498 Author contributions

499 PDC conceived the study idea and design. JL and GM collected samples and extracted DNA. FC & LF  
500 conducted sequencing. JL, RCR, AMW, JCW & WB conducted bioinformatics analysis. PDC and JL  
501 wrote the manuscript with contributions from everybody else. OOS, MJC & PDC supervised the  
502 project.

## 503 Competing interests

504 The authors declare that they have no competing interests.

## 505 References

- 506 1. Bourdichon F, Casaregola S, Farrokh C, Frisvad JC, Gerds ML, Hammes WP, Harnett J, Huys G,  
507 Laulund S, Ouwehand A: **Food fermentations: microorganisms with technological beneficial**  
508 **use**. *International journal of food microbiology* 2012, **154**(3):87-97.
- 509 2. Marco ML, Heeney D, Binda S, Cifelli CJ, Cotter PD, Foligne B, Gänzle M, Kort R, Pasin G,  
510 Pihlanto A: **Health benefits of fermented foods: microbiota and beyond**. *Current opinion in*  
511 *biotechnology* 2017, **44**:94-102.
- 512 3. Nielsen ES, Garnås E, Jensen KJ, Hansen L, Olsen PS, Ritz C, Krych L, Nielsen DSS: **Lacto-**  
513 **fermented sauerkraut improves symptoms in IBS patients independent of product**  
514 **pasteurisation-a pilot study**. *Food & function* 2018.
- 515 4. Gahruie HH, Eskandari MH, Mesbahi G, Hanifpour MA: **Scientific and technical aspects of**  
516 **yogurt fortification: A review**. *Food Science and Human Wellness* 2015, **4**(1):1-8.
- 517 5. Villarreal-Soto SA, Beaufort S, Bouajila J, Souchard JP, Taillandier P: **Understanding**  
518 **Kombucha Tea Fermentation: A Review**. *Journal of food science* 2018, **83**(3):580-588.
- 519 6. Jayabalan R, Malbaša RV, Sathishkumar M: **Kombucha Tea: Metabolites**. In: *Fungal*  
520 *Metabolites*. Springer; 2017: 965-978.
- 521 7. Hong K-J, Lee C-H, Kim SW: **Aspergillus oryzae GB-107 fermentation improves nutritional**  
522 **quality of food soybeans and feed soybean meals**. *Journal of medicinal food* 2004, **7**(4):430-  
523 435.
- 524 8. Tamang JP, Tamang N, Thapa S, Dewan S, Tamang B, Yonzan H, Rai AK, Chettri R,  
525 Chakrabarty J, Kharel N: **Microorganisms and nutritional value of ethnic fermented foods**  
526 **and alcoholic beverages of North East India**. 2012.
- 527 9. Hertzler SR, Clancy SM: **Kefir improves lactose digestion and tolerance in adults with**  
528 **lactose maldigestion**. *Journal of the American Dietetic Association* 2003, **103**(5):582-587.
- 529 10. Xiao Y, Wang L, Rui X, Li W, Chen X, Jiang M, Dong M: **Enhancement of the antioxidant**  
530 **capacity of soy whey by fermentation with Lactobacillus plantarum B1–6**. *Journal of*  
531 *Functional Foods* 2015, **12**:33-44.
- 532 11. Shin D, Jeong D: **Korean traditional fermented soybean products: Jang**. *Journal of Ethnic*  
533 *Foods* 2015, **2**(1):2-7.
- 534 12. Slattery C, Cotter PD, O'Toole PW: **Analysis of Health Benefits Conferred by Lactobacillus**  
535 **Species from Kefir**. *Nutrients* 2019, **11**(6):1252.
- 536 13. Peters A, Krumbholz P, Jäger E, Heintz-Buschart A, Çakir MV, Rothmund S, Gaudl A,  
537 Ceglarek U, Schöneberg T, Stäubert C: **Metabolites of lactic acid bacteria present in**  
538 **fermented foods are highly potent agonists of human hydroxycarboxylic acid receptor 3**.  
539 *PLoS genetics* 2019, **15**(5):e1008145.
- 540 14. Sonnenburg ED, Sonnenburg JL: **The ancestral and industrialized gut microbiota and**  
541 **implications for human health**. *Nature Reviews Microbiology* 2019, **17**(6):383.
- 542 15. Sonnenburg JL, Sonnenburg ED: **Vulnerability of the industrialized microbiota**. *Science* 2019,  
543 **366**(6464):eaaw9255.
- 544 16. Chilton S, Burton J, Reid G: **Inclusion of fermented foods in food guides around the world**.  
545 *Nutrients* 2015, **7**(1):390-404.
- 546 17. Wolfe BE, Dutton RJ: **Fermented foods as experimentally tractable microbial ecosystems**.  
547 *Cell* 2015, **161**(1):49-55.

- 548 18. Wuyts S, Van Beeck W, Oerlemans EF, Wittouck S, Claes IJ, De Boeck I, Weckx S, Lievens B,  
549 De Vuyst L, Lebeer S: **Carrot juice fermentations as man-made microbial ecosystems**  
550 **dominated by lactic acid bacteria**. *Appl Environ Microbiol* 2018, **84**(12):e00134-00118.
- 551 19. Knight S, Klaere S, Morrison-Whittle P, Goddard MR: **Fungal diversity during fermentation**  
552 **correlates with thiol concentration in wine**. *Australian journal of grape and wine research*  
553 2018, **24**(1):105-112.
- 554 20. Liu X, Kuda T, Takahashi H, Kimura B: **Bacterial and fungal microbiota of spontaneously**  
555 **fermented Chinese products, Rubing milk cake and Yan-cai vegetable pickles**. *Food*  
556 *microbiology* 2018, **72**:106-111.
- 557 21. Du R, Ge J, Zhao D, Sun J, Ping W, Song G: **Bacterial diversity and community structure**  
558 **during fermentation of Chinese sauerkraut with Lactobacillus casei 11MZ-5-1 by Illumina**  
559 **Miseq sequencing**. *Letters in applied microbiology* 2018, **66**(1):55-62.
- 560 22. De Filippis F, Troise AD, Vitaglione P, Ercolini D: **Different temperatures select distinctive**  
561 **acetic acid bacteria species and promotes organic acids production during Kombucha tea**  
562 **fermentation**. *Food microbiology* 2018, **73**:11-16.
- 563 23. Coton M, Pawtowski A, Taminiau B, Burgaud G, Deniel F, Coulloume-Labarthe L, Fall A,  
564 Daube G, Coton E: **Unraveling microbial ecology of industrial-scale Kombucha**  
565 **fermentations by metabarcoding and culture-based methods**. *FEMS microbiology ecology*  
566 2017, **93**(5).
- 567 24. Lee M, Song JH, Jung MY, Lee SH, Chang JY: **Large-scale targeted metagenomics analysis of**  
568 **bacterial ecological changes in 88 kimchi samples during fermentation**. *Food microbiology*  
569 2017, **66**:173-183.
- 570 25. Marsh AJ, O'Sullivan O, Hill C, Ross RP, Cotter PD: **Sequencing-Based Analysis of the**  
571 **Bacterial and Fungal Composition of Kefir Grains and Milks from Multiple Sources**. *PLOS*  
572 *ONE* 2013, **8**(7):e69371.
- 573 26. Marsh AJ, O'Sullivan O, Hill C, Ross RP, Cotter PD: **Sequence-based analysis of the bacterial**  
574 **and fungal compositions of multiple kombucha (tea fungus) samples**. *Food microbiology*  
575 2014, **38**:171-178.
- 576 27. Marsh AJ, O'Sullivan O, Hill C, Ross RP, Cotter PD: **Sequence-based analysis of the microbial**  
577 **composition of water kefir from multiple sources**. *FEMS microbiology letters* 2013,  
578 **348**(1):79-85.
- 579 28. Dertli E, Çon AH: **Microbial diversity of traditional kefir grains and their role on kefir aroma**.  
580 *LWT-Food Science and Technology* 2017, **85**:151-157.
- 581 29. Zalewska B, Kaevska M, Slana I: **Sequence Analysis of Changes in Microbial Composition in**  
582 **Different Milk Products During Fermentation and Storage**. *Current microbiology* 2018,  
583 **75**(2):202-205.
- 584 30. Zhong Z, Hou Q, Kwok L, Yu Z, Zheng Y, Sun Z, Menghe B, Zhang H: **Bacterial microbiota**  
585 **compositions of naturally fermented milk are shaped by both geographic origin and**  
586 **sample type**. *J Dairy Sci* 2016, **99**(10):7832-7841.
- 587 31. Lee M, Song JH, Jung MY, Lee SH, Chang JY: **Large-scale targeted metagenomics analysis of**  
588 **bacterial ecological changes in 88 kimchi samples during fermentation**. *Food microbiology*  
589 2017, **66**:173-183.
- 590 32. Lee SH, Jung JY, Jeon CO: **Source tracking and succession of kimchi lactic acid bacteria**  
591 **during fermentation**. *Journal of food science* 2015, **80**(8):M1871-M1877.
- 592 33. Kim MJ, Kwak HS, Kim SS: **Effects of salinity on bacterial communities, Maillard reactions,**  
593 **isoflavone composition, antioxidation and antiproliferation in Korean fermented soybean**  
594 **paste (doenjang)**. *Food chemistry* 2018, **245**:402-409.
- 595 34. Medina E, Brenes M, García-García P, Romero C, de Castro A: **Microbial ecology along the**  
596 **processing of Spanish olives darkened by oxidation**. *Food Control* 2018, **86**:35-41.



- 597 35. Wang Z-M, Lu Z-M, Shi J-S, Xu Z-H: **Exploring flavour-producing core microbiota in**  
598 **multispecies solid-state fermentation of traditional Chinese vinegar.** *Scientific reports* 2016,  
599 **6**:26818.
- 600 36. Diaz M, Kellingray L, Akinyemi N, Adefiranye OO, Olaonipekun AB, Bayili GR, Ibezim J, du  
601 Plessis AS, Houngbédji M, Kanya D: **Comparison of the microbial composition of African**  
602 **fermented foods using amplicon sequencing.** *Scientific reports* 2019, **9**(1):1-8.
- 603 37. Wu L-H, Lu Z-M, Zhang X-J, Wang Z-M, Yu Y-J, Shi J-S, Xu Z-H: **Metagenomics reveals flavour**  
604 **metabolic network of cereal vinegar microbiota.** *Food microbiology* 2017, **62**:23-31.
- 605 38. Lu Z-M, Liu N, Wang L-J, Wu L-H, Gong J-S, Yu Y-J, Li G-Q, Shi J-S, Xu Z-H: **Elucidating and**  
606 **Regulating the Acetoin-producing Role of Microbial Functional Group in Multispecies**  
607 **Acetic Acid Fermentation.** *Applied and environmental microbiology* 2016:AEM. 01331-  
608 01316.
- 609 39. Zepeda MM, Edwards N, Madsen M, Abel-Kistrup M, Puetz L, Sicheritz-Ponten T, Swiegers J:  
610 **Influence of *Oenococcus oeni* and *Brettanomyces bruxellensis* on Aged Wine Microbial**  
611 **Taxonomic and Functional Profiles.** 2017.
- 612 40. Illeghems K, Weckx S, De Vuyst L: **Applying meta-pathway analyses through metagenomics**  
613 **to identify the functional properties of the major bacterial communities of a single**  
614 **spontaneous cocoa bean fermentation process sample.** *Food microbiology* 2015, **50**:54-63.
- 615 41. Lyu C, Chen C, Ge F, Liu D, Zhao S, Chen D: **A preliminary metagenomic study of puer tea**  
616 **during pile fermentation.** *Journal of the Science of Food and Agriculture* 2013, **93**(13):3165-  
617 3174.
- 618 42. Sulaiman J, Gan HM, Yin W-F, Chan K-G: **Microbial succession and the functional potential**  
619 **during the fermentation of Chinese soy sauce brine.** *Frontiers in microbiology* 2014, **5**:556.
- 620 43. Ferrocino I, Bellio A, Giordano M, Macori G, Romano A, Rantsiou K, Decastelli L, Cocolin L:  
621 **Shotgun metagenomics and volatilome profile of the microbiota of fermented sausages.**  
622 *Applied and environmental microbiology* 2018, **84**(3):e02120-02117.
- 623 44. Jung JY, Lee SH, Kim JM, Park MS, Bae J-W, Hahn Y, Madsen EL, Jeon CO: **Metagenomic**  
624 **analysis of kimchi, the Korean traditional fermented food.** *Applied and environmental*  
625 *microbiology* 2011.
- 626 45. Yao G, Yu J, Hou Q, Hui W, Liu W, Kwok L-Y, Menghe B, Sun T, Zhang H, Zhang W: **A**  
627 **perspective study of koumiss microbiome by metagenomics analysis based on single-cell**  
628 **amplification technique.** *Frontiers in microbiology* 2017, **8**:165.
- 629 46. Walsh AM, Crispie F, Daari K, O'Sullivan O, Martin JC, Arthur CT, Claesson MJ, Scott KP,  
630 Cotter PD: **Strain-level metagenomic analysis of the fermented dairy beverage nunu**  
631 **highlights potential food safety risks.** *Applied and Environmental Microbiology* 2017:AEM.  
632 01144-01117.
- 633 47. Nalbantoglu U, Cakar A, Dogan H, Abaci N, Ustek D, Sayood K, Can H: **Metagenomic analysis**  
634 **of the microbial community in kefir grains.** *Food microbiology* 2014, **41**:42-51.
- 635 48. Wolfe BE, Button JE, Santarelli M, Dutton RJ: **Cheese rind communities provide tractable**  
636 **systems for in situ and in vitro studies of microbial diversity.** *Cell* 2014, **158**(2):422-433.
- 637 49. Verce M, De Vuyst L, Weckx S: **Shotgun Metagenomics of a Water Kefir Fermentation**  
638 **Ecosystem Reveals a Novel *Oenococcus* Species.** *Frontiers in microbiology* 2019, **10**.
- 639 50. Parkouda C, Nielsen DS, Azokpota P, Ivette Irène Ouoba L, Amoa-Awua WK, Thorsen L,  
640 Hounhouigan JD, Jensen JS, Tano-Debrah K, Diawara B: **The microbiology of alkaline-**  
641 **fermentation of indigenous seeds used as food condiments in Africa and Asia.** *Critical*  
642 *Reviews in Microbiology* 2009, **35**(2):139-156.
- 643 51. Miller ER, Kearns PJ, Niccum BA, Schwartz JOM, Ornstein A, Wolfe BE: **Establishment**  
644 **limitation constrains the abundance of lactic acid bacteria in the Napa cabbage**  
645 **phyllosphere.** *Appl Environ Microbiol* 2019:AEM. 00269-00219.
- 646 52. Turnbaugh PJ, Ley RE, Hamady M, Fraser-Liggett CM, Knight R, Gordon JI: **The human**  
647 **microbiome project.** *Nature* 2007, **449**(7164):804.

- 648 53. Lebeer S, Vanderleyden J, De Keersmaecker SC: **Genes and molecules of lactobacilli**  
649 **supporting probiotic action.** *Microbiol Mol Biol Rev* 2008, **72**(4):728-764.
- 650 54. Hayakawa K, Kimura M, Kasaha K, Matsumoto K, Sansawa H, Yamori Y: **Effect of a  $\gamma$ -**  
651 **aminobutyric acid-enriched dairy product on the blood pressure of spontaneously**  
652 **hypertensive and normotensive Wistar–Kyoto rats.** *British Journal of Nutrition* 2004,  
653 **92**(3):411-417.
- 654 55. Mombereau C, Kaupmann K, Froestl W, Sansig G, van der Putten H, Cryan JF: **Genetic and**  
655 **pharmacological evidence of a role for GABA B receptors in the modulation of anxiety-and**  
656 **antidepressant-like behavior.** *Neuropsychopharmacology* 2004, **29**(6):1050.
- 657 56. Weimann A, Mooren K, Frank J, Pope PB, Bremges A, McHardy AC: **From genomes to**  
658 **phenotypes: Traitair, the microbial trait analyzer.** *MSystems* 2016, **1**(6):e00101-00116.
- 659 57. Jain C, Rodriguez-R LM, Phillippy AM, Konstantinidis KT, Aluru S: **High throughput ANI**  
660 **analysis of 90K prokaryotic genomes reveals clear species boundaries.** *Nature*  
661 *Communications* 2018, **9**(1):5114.
- 662 58. Nair BM, Prajapati JB: **The history of fermented foods.** In: *Handbook of fermented functional*  
663 *foods.* CRC Press; 2003: 17-42.
- 664 59. Research PM: **Global market study on Fermented ingredients: Pharmaceutical applications**  
665 **of fermented ingredients to gain traction during 2017-2022.** 2017:170.
- 666 60. Von Neubeck M, Huptas C, Glück C, Krewinkel M, Stoeckel M, Stressler T, Fischer L, Hinrichs  
667 J, Scherer S, Wenning M: **Pseudomonas helleri sp. nov. and Pseudomonas**  
668 **weihenstephanensis sp. nov., isolated from raw cow's milk.** *International journal of*  
669 *systematic and evolutionary microbiology* 2016, **66**(3):1163-1173.
- 670 61. Cotter PD, Hill C, Ross RP: **Food microbiology: bacteriocins: developing innate immunity for**  
671 **food.** *Nature Reviews Microbiology* 2005, **3**(10):777.
- 672 62. Dobson A, Cotter PD, Ross RP, Hill C: **Bacteriocin production: a probiotic trait?** *Appl Environ*  
673 *Microbiol* 2012, **78**(1):1-6.
- 674 63. Halami PM, Ramesh A, Chandrashekar A: **Fermenting cucumber, a potential source for the**  
675 **isolation of pediocin-like bacteriocin producers.** *World Journal of Microbiology and*  
676 *Biotechnology* 2005, **21**(8-9):1351-1358.
- 677 64. Papagianni M, Anastasiadou S: **Pediocins: The bacteriocins of Pediococci. Sources,**  
678 **production, properties and applications.** *Microbial cell factories* 2009, **8**(1):3.
- 679 65. Herbin S, Mathieu F, Brulé F, Branlant C, Lefebvre G, Lebrihi A: **Characteristics and genetic**  
680 **determinants of bacteriocin activities produced by Carnobacterium piscicola CP5 isolated**  
681 **from cheese.** *Current microbiology* 1997, **35**(6):319-326.
- 682 66. Lončar E, Djurić M, Malbaša R, Kolarov L, Klačnja M: **Influence of working conditions upon**  
683 **kombucha conducted fermentation of black tea.** *Food and Bioproducts Processing* 2006,  
684 **84**(3):186-192.
- 685 67. Guzel-Seydim Z, Seydim A, Greene A: **Organic acids and volatile flavor components evolved**  
686 **during refrigerated storage of kefir.** *Journal of Dairy Science* 2000, **83**(2):275-277.
- 687 68. Jacobson LH, Vlachou S, Slattery DA, Li X, Cryan JF: **The gamma-aminobutyric acid B**  
688 **receptor in depression and reward.** *Biological psychiatry* 2018, **83**(11):963-976.
- 689 69. Cotter PD, Hill C: **Surviving the acid test: responses of gram-positive bacteria to low pH.**  
690 *Microbiol Mol Biol Rev* 2003, **67**(3):429-453.
- 691 70. Le Flèche-Matéos A, Levast M, Lompriez F, Arnoux Y, Andonian C, Perraud M, Vincent V,  
692 Gouilh MA, Thiberge J-M, Vandenbogaert M: **Rouxiella chamberiensis gen. nov., sp. nov., a**  
693 **new Enterobacteriaceae isolated from parenteral nutrition bags.** *International journal of*  
694 *systematic and evolutionary microbiology* 2015:na.
- 695 71. Hiraiishi A, Matsuzawa Y, Kanbe T, Wakao N: **Acidisphaera rubrifaciens gen. nov., sp. nov.,**  
696 **an aerobic bacteriochlorophyll-containing bacterium isolated from acidic environments.**  
697 *International journal of systematic and evolutionary microbiology* 2000, **50**(4):1539-1546.

- 698 72. Pasolli E, Asnicar F, Manara S, Zolfo M, Karcher N, Armanini F, Beghini F, Manghi P, Tett A,  
699 Ghensi P: **Extensive unexplored human microbiome diversity revealed by over 150,000**  
700 **genomes from metagenomes spanning age, geography, and lifestyle.** *Cell* 2019, **176**(3):649-  
701 662. e620.
- 702 73. Clooney AG, Fouhy F, Sleator RD, O’Driscoll A, Stanton C, Cotter PD, Claesson MJ: **Comparing**  
703 **apples and oranges?: next generation sequencing and its impact on microbiome analysis.**  
704 *PLoS One* 2016, **11**(2):e0148028.
- 705 74. Peng Y, Leung HC, Yiu S-M, Chin FY: **IDBA-UD: a de novo assembler for single-cell and**  
706 **metagenomic sequencing data with highly uneven depth.** *Bioinformatics* 2012,  
707 **28**(11):1420-1428.
- 708 75. Menzel P, Ng K, Krogh A: **Fast and sensitive taxonomic classification for metagenomics with**  
709 **Kaiju.** *Nat Commun* **7: 11257. In.; 2016.**
- 710 76. Walsh AM, Crispie F, O’Sullivan O, Finnegan L, Claesson MJ, Cotter PD: **Species classifier**  
711 **choice is a key consideration when analysing low-complexity food microbiome data.**  
712 *Microbiome* 2018, **6**(1):50.
- 713 77. Silva GGZ, Green KT, Dutilh BE, Edwards RA: **SUPER-FOCUS: a tool for agile functional**  
714 **analysis of shotgun metagenomic data.** *Bioinformatics* 2015, **32**(3):354-361.
- 715 78. Asnicar F, Weingart G, Tickle TL, Huttenhower C, Segata N: **Compact graphical**  
716 **representation of phylogenetic data and metadata with GraPhlAn.** *PeerJ* 2015, **3**:e1029.
- 717 79. Truong DT, Tett A, Pasolli E, Huttenhower C, Segata N: **Microbial strain-level population**  
718 **structure and genetic diversity from metagenomes.** *Genome research* 2017, **27**(4):626-638.
- 719 80. Truong DT, Franzosa EA, Tickle TL, Scholz M, Weingart G, Pasolli E, Tett A, Huttenhower C,  
720 Segata N: **MetaPhlAn2 for enhanced metagenomic taxonomic profiling.** *Nature methods*  
721 2015, **12**(10):902.
- 722 81. Team RC: **R: A language and environment for statistical computing (Version 3.1. 2).** Vienna,  
723 **Austria: R Foundation for Statistical Computing.** In.: ISBN 3-900051-07-0, [http://www.R-](http://www.R-project.org)  
724 [project.org](http://www.R-project.org); 2014.
- 725 82. Oksanen J, Kindt R, Legendre P, O’Hara B, Stevens MHH, Oksanen MJ, Suggests M: **The vegan**  
726 **package.** *Community ecology package* 2007, **10**:631-637.
- 727 83. Segata N, Izard J, Waldron L, Gevers D, Miropolsky L, Garrett WS, Huttenhower C:  
728 **Metagenomic biomarker discovery and explanation.** *Genome biology* 2011, **12**(6):R60.
- 729 84. Lakin SM, Dean C, Noyes NR, Dettenwanger A, Ross AS, Doster E, Rovira P, Abdo Z, Jones KL,  
730 Ruiz J: **MEGARes: an antimicrobial resistance database for high throughput sequencing.**  
731 *Nucleic acids research* 2016, **45**(D1):D574-D580.
- 732 85. van Heel AJ, de Jong A, Song C, Viel JH, Kok J, Kuipers OP: **BAGEL4: a user-friendly web**  
733 **server to thoroughly mine RiPPs and bacteriocins.** *Nucleic acids research* 2018,  
734 **46**(W1):W278-W281.
- 735 86. Abubucker S, Segata N, Goll J, Schubert A, Izard J, Cantarel B, Rodriguez-Mueller B, Zucker J,  
736 Thiagarajan M, Henrissat B: **HUMAN2: the HMP Unified Metabolic Analysis Network 2.** In.;;  
737 2017.
- 738 87. Suzek BE, Huang H, McGarvey P, Mazumder R, Wu CH: **UniRef: comprehensive and non-**  
739 **redundant UniProt reference clusters.** *Bioinformatics* 2007, **23**(10):1282-1288.
- 740 88. Kang DD, Froula J, Egan R, Wang Z: **MetaBAT, an efficient tool for accurately reconstructing**  
741 **single genomes from complex microbial communities.** *PeerJ* 2015, **3**:e1165.
- 742 89. Parks DH, Imelfort M, Skennerton CT, Hugenholtz P, Tyson GW: **CheckM: assessing the**  
743 **quality of microbial genomes recovered from isolates, single cells, and metagenomes.**  
744 *Genome research* 2015, **25**(7):1043-1055.
- 745 90. Menzel P, Ng KL, Krogh A: **Fast and sensitive taxonomic classification for metagenomics**  
746 **with Kaiju.** *Nature communications* 2016, **7.**

- 747 91. Segata N, Börnigen D, Morgan XC, Huttenhower C: **PhyloPhlAn is a new method for**  
748 **improved phylogenetic and taxonomic placement of microbes.** *Nature Communications*  
749 2013, **4**:2304.
- 750 92. Pruitt KD, Tatusova T, Maglott DR: **NCBI reference sequences (RefSeq): a curated non-**  
751 **redundant sequence database of genomes, transcripts and proteins.** *Nucleic acids research*  
752 2006, **35**(suppl\_1):D61-D65.
- 753 93. Seemann T: **Prokka: rapid prokaryotic genome annotation.** *Bioinformatics* 2014,  
754 **30**(14):2068-2069.
- 755 94. Cacciatore S, Tenori L, Luchinat C, Bennett PR, MacIntyre DA: **KODAMA: an R package for**  
756 **knowledge discovery and data mining.** *Bioinformatics* 2017, **33**(4):621-623.
- 757 95. Wickham H: **ggplot2: elegant graphics for data analysis:** Springer; 2016.
- 758 96. Abriouel H, Pérez Montoro B, Casimiro-Soriguer CS, Pérez Pulido AJ, Knapp CW, Caballero  
759 Gómez N, Castillo-Gutiérrez S, Estudillo-Martínez MD, Gálvez A, Benomar N: **Insight into**  
760 **potential probiotic markers predicted in Lactobacillus pentosus MP-10 genome sequence.**  
761 *Frontiers in microbiology* 2017, **8**:891.
- 762 97. Kolde R, Kolde MR: **Package ‘pheatmap’.** *R Package* 2015, **1**(7).

763

764

## 765 Figure Legends

766 **Figure 1| Beta diversity.** **A)** Non-metric Multidimensional Scaling (NMDS) of Bray-Curtis distances  
767 between the 58 samples, calculated for the species level composition. Samples are coloured by  
768 substrate **B)** NMDS of Bray-Curtis distances between the 58 samples, calculated for the Superfocus  
769 Level 3 composition. Samples are coloured by substrate **C)** NMDS of Bray-Curtis distances of  
770 Carbohydrate pathways assigned with Humann2. Samples are coloured by substrate **D)** Maximum  
771 likelihood phylogenetic tree of 16 *Lactococcus lactis* strains from different food samples. Strains are  
772 coloured according to food substrate source. All figures show clear shifts in samples/strains by  
773 substrate.

774 **Figure 2| PLS-DA** Variance of sample clustering according to fermentation process and primary  
775 substrate. PLS-DA constrained ordination of samples according to fermentation process, illustrates  
776 that not all samples exhibit coordination of detected species composition that is dependent on the  
777 classification of fermentation process. Samples deviating from the core fermentation-type clusters  
778 show unique compositions. PLS-DA, Partial least squares discriminant analysis. Ellipses represent

779 confidence levels of 0.9 of the respective data. Axis plots are boxplots of the plotted data, illustrating  
780 distribution of samples according to axis.

781

782 **Figure 3| Alpha diversity by substrate** **A)** Number of species (abundance higher than 0.1%) per  
783 sample. Anova was used as the data had a normal distribution. **B)** Shannon index of samples.  
784 Kruskal-Wallis was used as the data was non-parametric. **C)** Simpsons diversity index of samples.  
785 Kruskal-Wallis was used as the data was non-parametric. In all three, the pairwise tests were carried  
786 out between Dairy, Brine & Sugar (T-test for parametric and Wilcoxon pairwise test for non-  
787 parametric). Coconut kefir and Soy had insufficient sample size for pairwise comparisons

788 **Figure 4| Differences by Fermentation** **A)** AMR profile of Spontaneous fermented foods and Starter  
789 culture foods. The AMR classes are normalised by counts per million per sample (CPM). **B)** Alpha  
790 diversity boxplots examined across Fermentation type (Spontaneous or Starter). T-test was used for  
791 number of species as data was parametric, Wilcoxon test was used for Shannons diversity index and  
792 Simpsons index as data was non-parametric.

793 **Figure 5| Descriptive plots** **A)** Heatmap showing the square root of the relative abundance of the  
794 top 50 Species across all foods. Metadata categories along the top x-axis. Both rows and columns are  
795 clustered according to similarity. **B)** Heatmap showing the relative abundance of the bacteriocin  
796 profile binned according to food substrate. **C)** Heatmap showing the square root of the relative  
797 abundance of the SuperFocus level 1 pathways **D)** Anti-microbial resistance (AMR) genes in counts  
798 per million (CPM) per food (pink) and per human sample (blue).

799 **Figure 6| PHAGC heatmap** Heatmap showing the presence of Potentially Health Associated Gene  
800 Clusters (PHAGC) across all 58 foods and 16 unfermented milk samples. Gene clusters are binned as  
801 potentially inferring an ability of the metagenome to colonise the gastro-intestinal tract, survive

802 transit to the gut and modulate the host phenotype. Each row is normalised across all samples,  
 803 therefore only comparing foods to one another.

804 **Figure 7 | Metagenome Assembled Genomes A)** Phylogenetic tree of the 127 high quality MAGs  
 805 with outer rings showing the metadata of the food. The green arrows indicate which MAGs are  
 806 potentially novel species. **B)** Predicted phenotypes of the 127 MAGs concatenated into their  
 807 respective substrate. Both rows and columns are clustered according to similarity.

808

809

## 810 Tables

| Sample                 | ID    | Origin  | Producer | Substrate | State  | Fermentation |
|------------------------|-------|---------|----------|-----------|--------|--------------|
| Wagashi Rind           | FS00a | Benin   | 1        | dairy     | solid  | Starter      |
| Wagashi Core           | FS00b | Benin   | 1        | dairy     | solid  | Starter      |
| Bread Kvass            | FS01  | Russia  | 2        | sugar     | liquid | Starter      |
| Carrot Kimchi          | FS02  | UK      | 2        | brine     | solid  | Spontaneous  |
| Boza                   | FS03  | UK      | 2        | sugar     | liquid | Starter      |
| Turnip                 | FS05  | UK      | 2        | brine     | solid  | Spontaneous  |
| Orange                 | FS06  | UK      | 2        | sugar     | solid  | Spontaneous  |
| Krauthehi (sauerkraut) | FS07  | Germany | 2        | brine     | solid  | Spontaneous  |
| Tepache                | FS08  | Mexico  | 2        | sugar     | liquid | Spontaneous  |
| Ginger Beer            | FS09  | UK      | 2        | sugar     | liquid | Spontaneous  |
| Tempeh                 | FS10  | UK      | 2        | soy       | solid  | Starter      |
| Cucumber               | FS11  | UK      | 2        | brine     | solid  | Spontaneous  |
| Milk Kefir             | FS12  | UK      | 2        | dairy     | liquid | Starter      |
| Water Kefir            | FS13  | UK      | 2        | sugar     | liquid | Starter      |
| Tofu Chilli            | FS16  | China   | 3        | soy       | solid  | Spontaneous  |

|                                   |      |         |    |       |        |             |
|-----------------------------------|------|---------|----|-------|--------|-------------|
| Daikon                            | FS17 | China   | 3  | brine | solid  | Spontaneous |
| Pickled vegetables                | FS19 | China   | 3  | brine | solid  | Spontaneous |
| Raw Sauerkraut & Juniper berries  | FS22 | Ireland | 4  | brine | solid  | Spontaneous |
| Brown rice amazake                | FS23 | Japan   | 4  | brine | solid  | Spontaneous |
| Beetroot Kvass                    | FS24 | Ireland | 5  | brine | liquid | Starter     |
| Kefir and fennel soup             | FS25 | Ireland | 5  | dairy | liquid | Starter     |
| Mead                              | FS26 | Ireland | 5  | sugar | liquid | Spontaneous |
| Sauerkraut                        | FS27 | Ireland | 5  | brine | solid  | Spontaneous |
| Dill dearg (sauerkraut)           | FS28 | Ireland | 6  | brine | solid  | Spontaneous |
| Kimchi                            | FS29 | Ireland | 6  | brine | solid  | Spontaneous |
| Golden child (sauerkraut)         | FS30 | Ireland | 6  | brine | solid  | Spontaneous |
| Water Kefir Hibiscus              | FS31 | Ireland | 6  | sugar | liquid | Starter     |
| Water Kefir lemon                 | FS32 | Ireland | 6  | sugar | liquid | Starter     |
| Water Kefir Ginger                | FS33 | Ireland | 6  | sugar | liquid | Starter     |
| Kombucha Vinegar                  | FS34 | Ireland | 6  | sugar | liquid | Starter     |
| RYAZHENKA                         | FS35 | Russia  | 7  | dairy | liquid | Starter     |
| Agousha                           | FS36 | Russia  | 7  | dairy | liquid | Starter     |
| ROSTAGROÈKPORT VOROŽNYJ           | FS37 | Russia  | 7  | dairy | solid  | Starter     |
| RUŽ'A                             | FS38 | Russia  | 7  | dairy | solid  | Starter     |
| Sauerkraut                        | FS39 | Ireland | 8  | brine | solid  | Spontaneous |
| Kombucha                          | FS40 | Ireland | 8  | sugar | liquid | Starter     |
| Apple Cider Vinegar               | FS41 | Ireland | 8  | sugar | liquid | Starter     |
| Raw Milk Kefir                    | FS42 | Ireland | 9  | dairy | liquid | Starter     |
| Pasterised Milk Kefir             | FS43 | Ireland | 9  | dairy | liquid | Starter     |
| Water Kefir(Pear, Ginger & Honey) | FS44 | Ireland | 9  | sugar | liquid | Starter     |
| Water Kefir(Pear, Ginger & Sugar) | FS45 | Ireland | 9  | sugar | liquid | Starter     |
| Dilly Carrots                     | FS46 | Ireland | 10 | brine | solid  | Spontaneous |
| Brussel Sprout Kimchi             | FS47 | Ireland | 10 | brine | solid  | Spontaneous |

|                             |      |         |    |               |        |             |
|-----------------------------|------|---------|----|---------------|--------|-------------|
| Kimchi                      | FS48 | Ireland | 10 | brine         | solid  | Spontaneous |
| Garlic Kraut                | FS49 | Ireland | 10 | brine         | solid  | Spontaneous |
| Dukkah Kraut                | FS50 | Ireland | 10 | brine         | solid  | Spontaneous |
| Ginger Sliced in 2% Brine   | FS51 | Ireland | 10 | brine         | solid  | Spontaneous |
| Daikon Radish in 2% Brine   | FS52 | Ireland | 10 | brine         | solid  | Spontaneous |
| Okra in 2% Brine            | FS53 | Ireland | 10 | brine         | solid  | Spontaneous |
| Tomatoes & mustard seeds in |      |         |    |               |        |             |
| 2% Brine                    | FS54 | Ireland | 10 | brine         | solid  | Spontaneous |
| Kombucha                    | FS55 | Ireland | 10 | sugar         | liquid | Starter     |
| Cherry Water Kefir          | FS56 | Ireland | 10 | sugar         | liquid | Starter     |
| Beet Kvass                  | FS57 | Ireland | 10 | brine         | liquid | Starter     |
| Coconut Kefir               | FS58 | Ireland | 5  | coconut_kefir | liquid | Starter     |
| Carrot sticks               | FS59 | Ireland | 5  | brine         | solid  | Spontaneous |
| Labne                       | FS60 | Ireland | 5  | dairy         | solid  | Starter     |
| Lemon and Ginger Fizz       | FS61 | Ireland | 5  | sugar         | liquid | Starter     |
| Scallion Kimchi             | FS62 | Ireland | 5  | brine         | solid  | Spontaneous |

811 **Table 1:** Table of Fermented foods and metadata. Origin is country of origin, Producer is a numeric  
812 code for each producer whom supplied foods, Substrate is the main ingredient fermented, State  
813 discriminates between solid and liquid foods and Fermentation refers to whether a starter culture  
814 was used or not.

815

816

817

818

819



820

821

822

823

824

825

826

827

828

829

830

| <b>Level</b>       | <b>Variable</b> | <b>P.Value</b> | <b>R.statistic</b> | <b>BH.padj</b> |
|--------------------|-----------------|----------------|--------------------|----------------|
| Family             | Type            | 0.001          | 0.651              | 0.008          |
| Genus              | Type            | 0.001          | 0.551              | 0.013          |
| Carbs              | Type            | 0.001          | 0.514              | 0.004          |
| Species            | Type            | 0.001          | 0.436              | 0.050          |
| Superfocus Level 3 | Type            | 0.001          | 0.345              | 0.004          |
| Superfocus Level 1 | Type            | 0.001          | 0.289              | 0.005          |
| Phylum             | Type            | 0.001          | 0.280              | 0.006          |
| Carbs              | Producer        | 0.001          | 0.221              | 0.004          |
| Superfocus Level 2 | Type            | 0.001          | 0.210              | 0.005          |

|                    |              |       |       |       |
|--------------------|--------------|-------|-------|-------|
| Family             | Fermentation | 0.001 | 0.202 | 0.006 |
| Species            | Fermentation | 0.001 | 0.171 | 0.017 |
| Species            | State        | 0.001 | 0.169 | 0.025 |
| Family             | State        | 0.001 | 0.167 | 0.007 |
| AMR                | Type         | 0.004 | 0.163 | 0.010 |
| Species            | Producer     | 0.003 | 0.160 | 0.008 |
| Carbs              | Fermentation | 0.001 | 0.154 | 0.003 |
| Genus              | Fermentation | 0.001 | 0.149 | 0.010 |
| Superfocus Level 1 | State        | 0.002 | 0.117 | 0.006 |
| Superfocus Level 3 | Fermentation | 0.002 | 0.111 | 0.006 |
| AMR                | Fermentation | 0.005 | 0.106 | 0.012 |
| Genus              | State        | 0.007 | 0.097 | 0.015 |
| Superfocus Level 3 | State        | 0.006 | 0.094 | 0.013 |
| Superfocus Level 1 | Fermentation | 0.002 | 0.093 | 0.006 |
| Superfocus Level 2 | Fermentation | 0.006 | 0.080 | 0.014 |
| Superfocus Level 2 | State        | 0.012 | 0.076 | 0.024 |
| Carbs              | State        | 0.019 | 0.073 | 0.035 |
| Bacteriocin        | State        | 0.018 | 0.070 | 0.035 |

831 **Table 2:** Anosim results order by descending R statistic. Only results that remained significant ( $p <$   
832 0.05) after Benjamini-Hochberg (BH.padj) corrections are included here (full table **Supplementary**  
833 **Table 6**).

834

| Food           | Sample | Closest NCBI match    | Identity |
|----------------|--------|-----------------------|----------|
| Bread Kvass    | FS01   | Gluconobacter cerinus | 93.4228  |
| Raw Milk Kefir | FS41   | Acetobacter malorum   | 86.3852  |

|                           |      |                                          |         |
|---------------------------|------|------------------------------------------|---------|
| Sauerkraut                | FS39 | Acetobacter malorum                      | 85.9458 |
| Boza                      | FS03 | Lactobacillus kimchiensis                | 82.2453 |
| Water Kefir lemon         | FS32 | Rouxiella chamberiensis                  | 81.3335 |
| Golden child (Sauerkraut) | FS30 | Leuconostoc gelidum subsp. gasicomitatum | 81.0244 |
| Cherry Water Kefir        | FS56 | Acetobacter aceti ATCC 23746             | 78.5186 |
| Water Kefir Hibiscus      | FS31 | Acidisphaera rubrifaciens HS-AP3         | 78.4976 |
| Water Kefir Ginger        | FS33 | Acidisphaera rubrifaciens HS-AP3         | 78.475  |
| Water Kefir lemon         | FS32 | Acidisphaera rubrifaciens HS-AP3         | 78.0727 |

---

835 **Table 3:** Putatively novel MAGs with FastANI identity scores to the closest genome in the NCBI

836 database.

837

838

**A) Species**

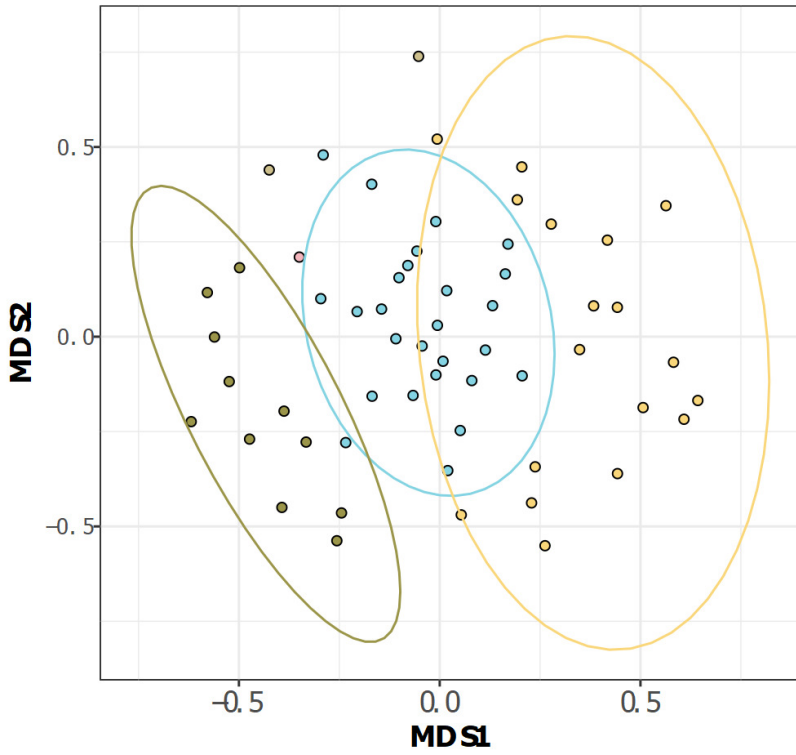

**B) Superfocus Level 3**

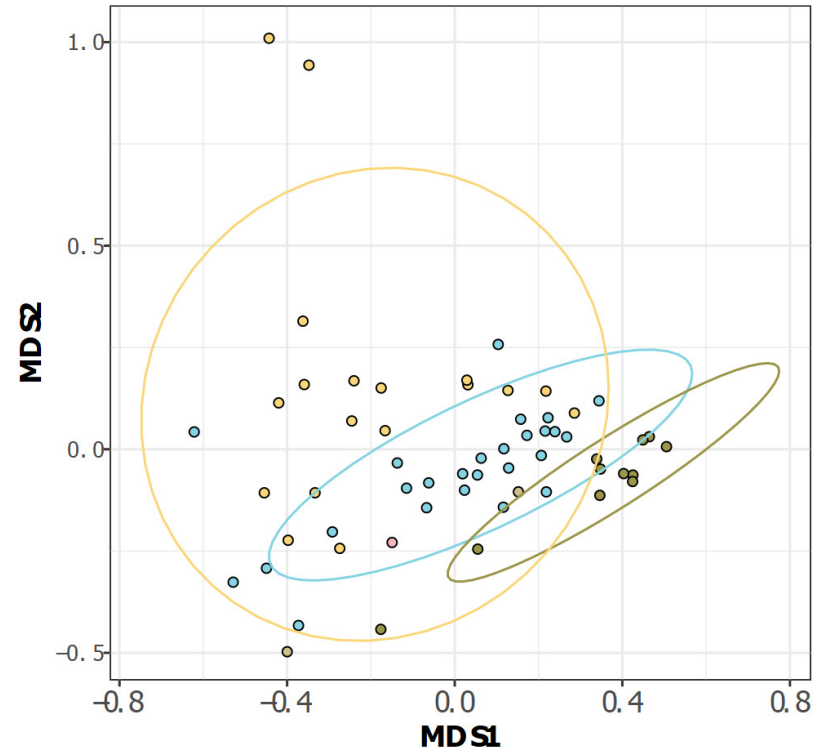

**C) Carbohydrate Pathways**

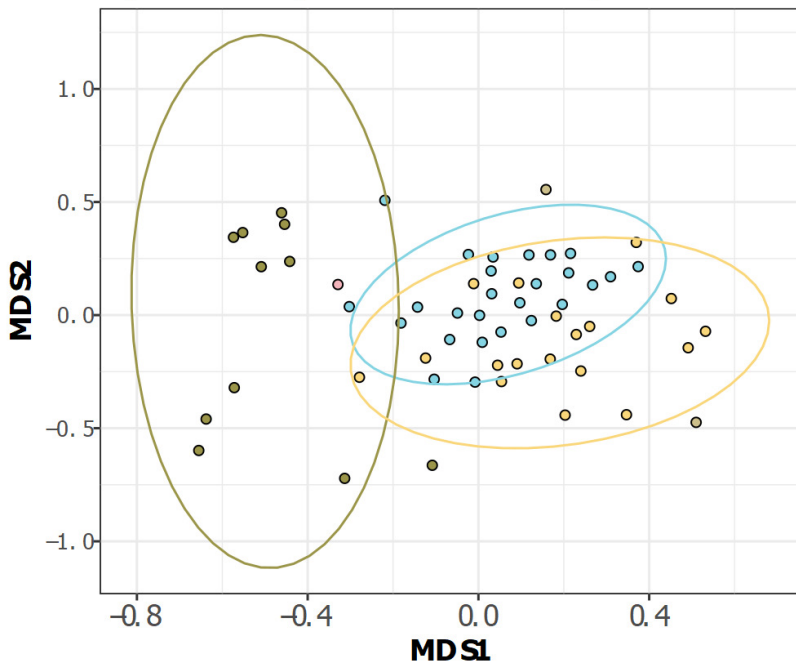

**D) Phylogenetic tree of *Lactococcus lactis***

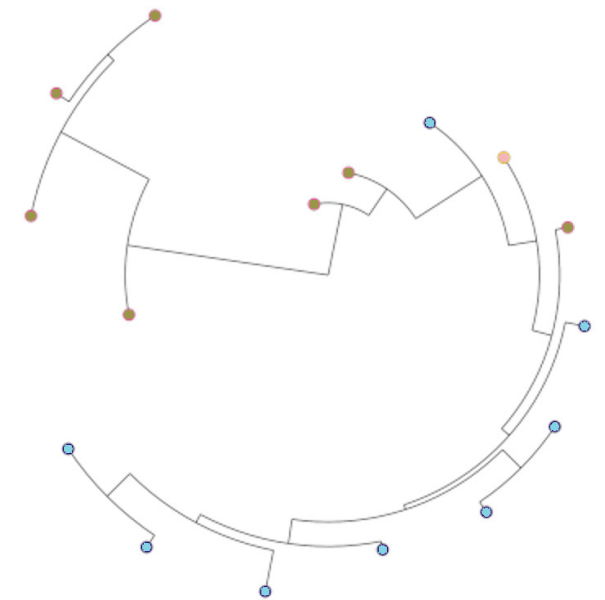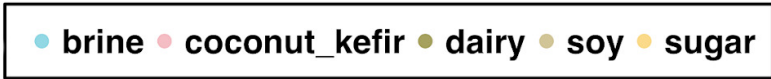

# PLS-DA (Species)

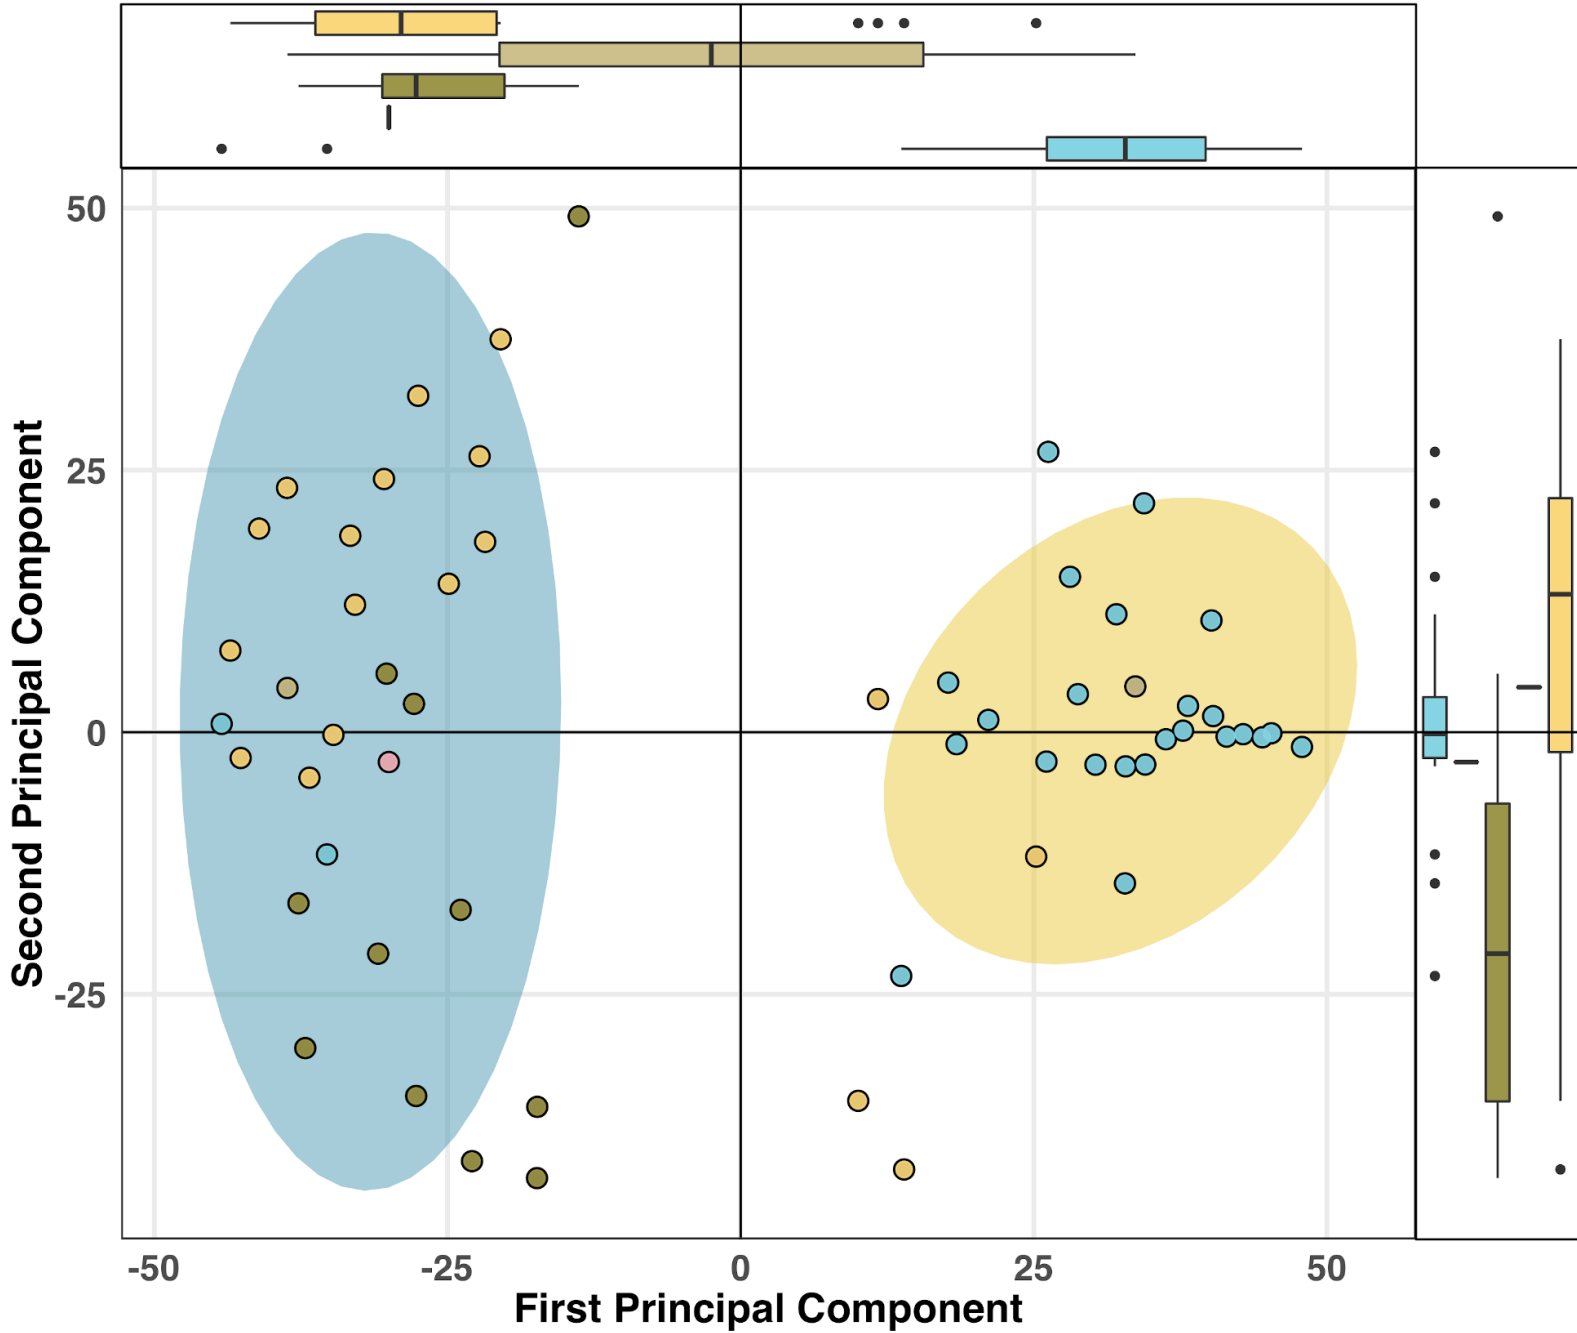

Spontaneous Starter

brine coconut\_kefir dairy soy sugar

A)

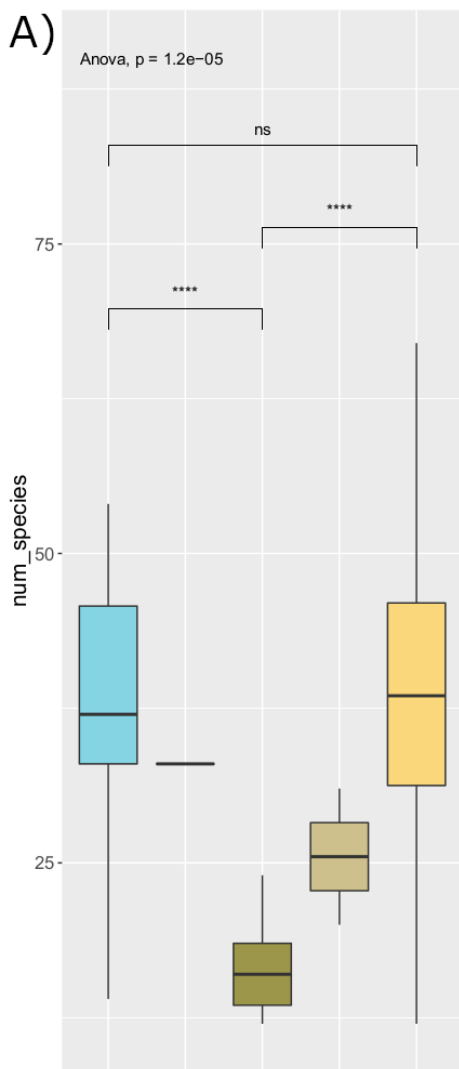

B)

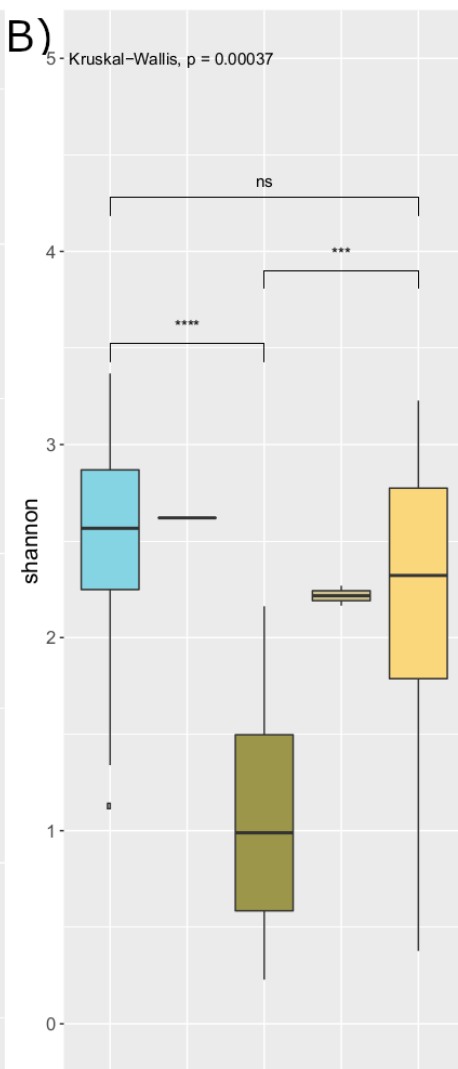

C)

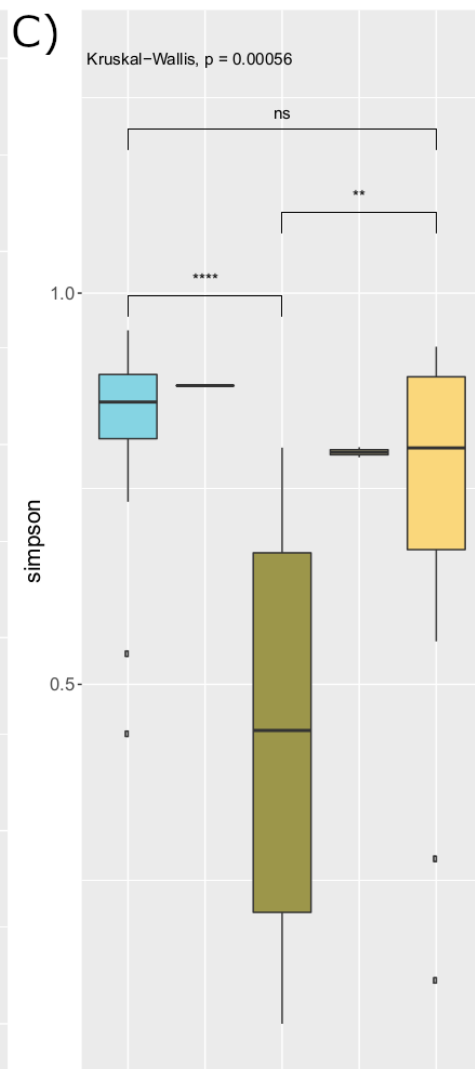

Type

- brine
- coconut\_kefir
- dairy
- soy
- sugar

A)

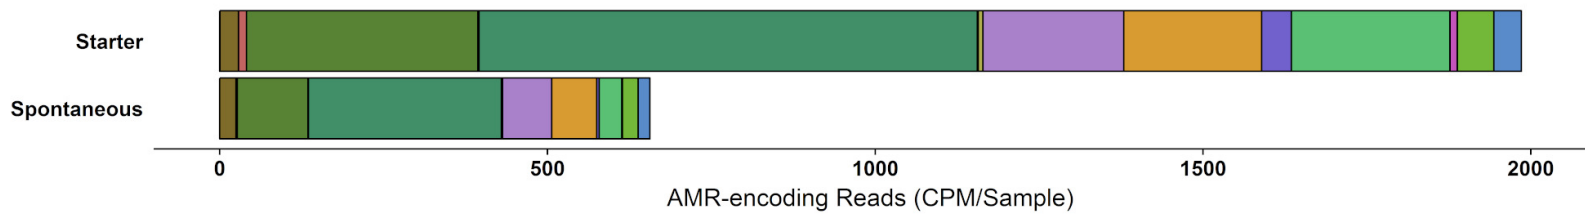

B)

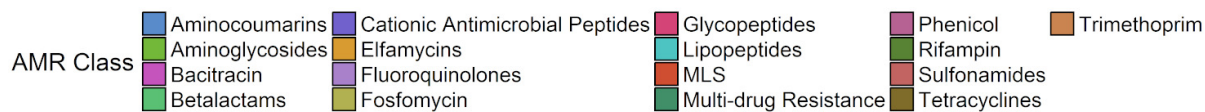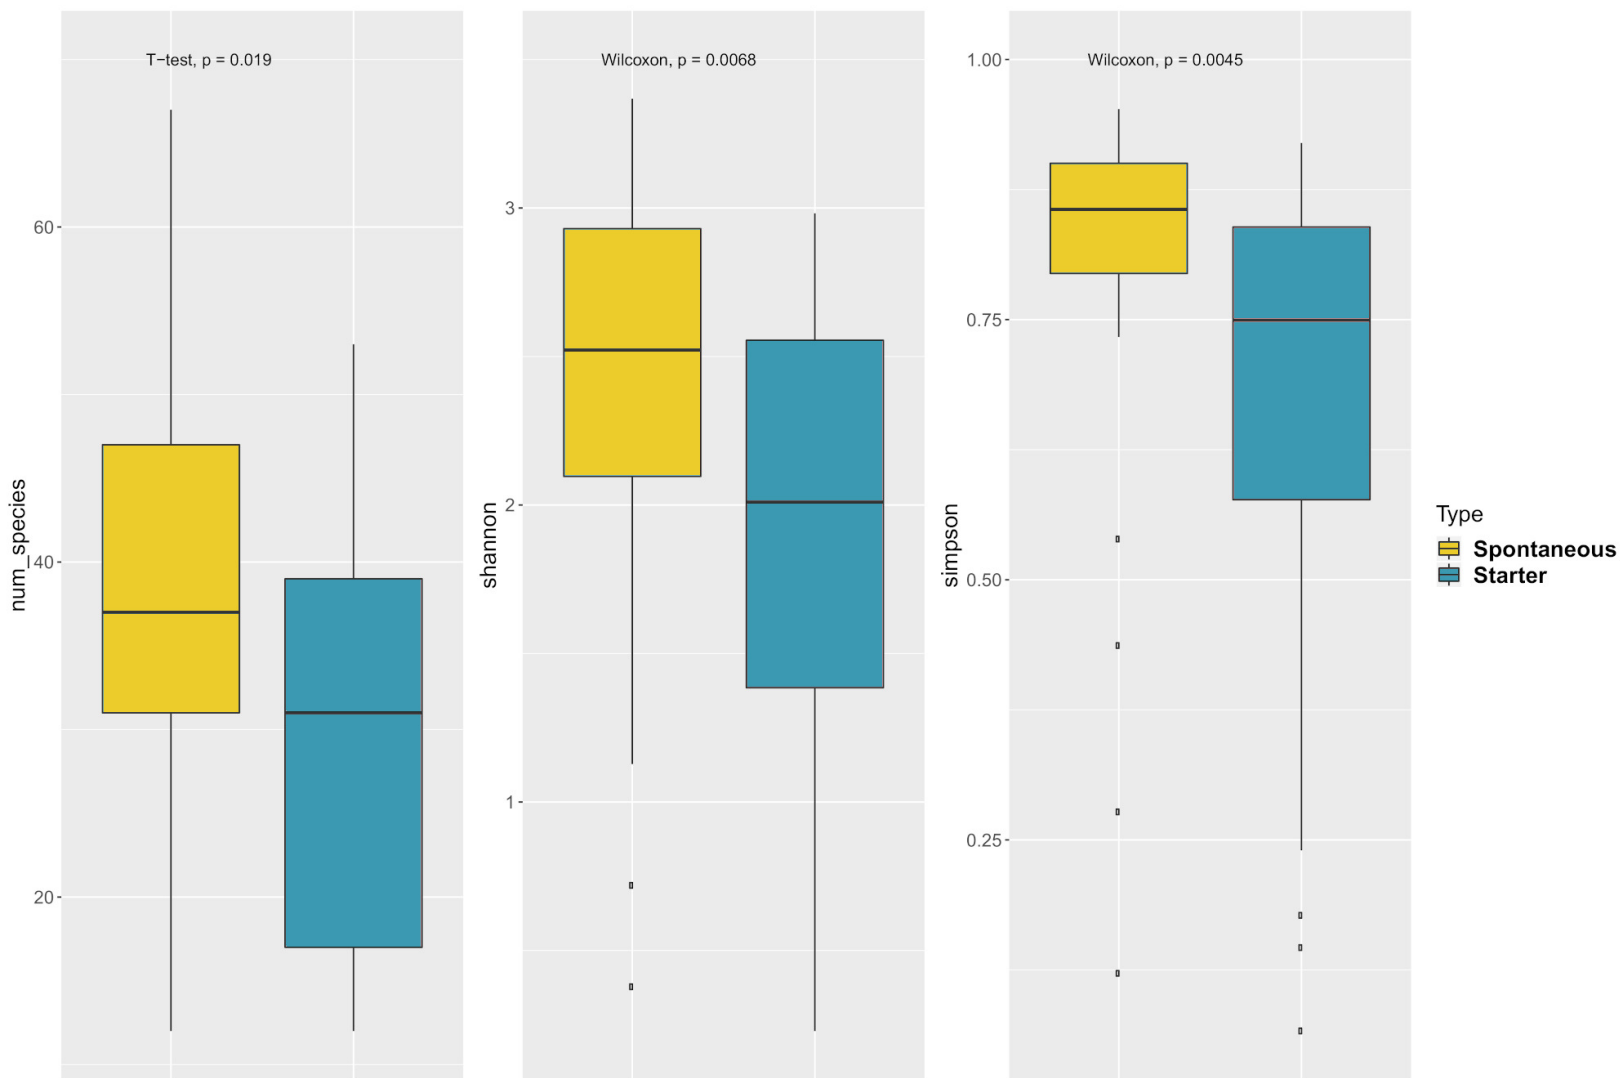

A)

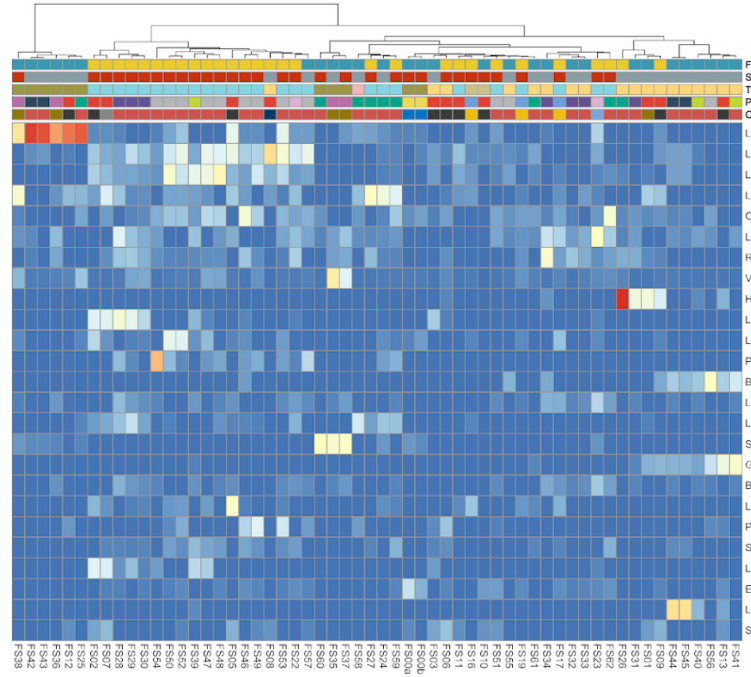

B)

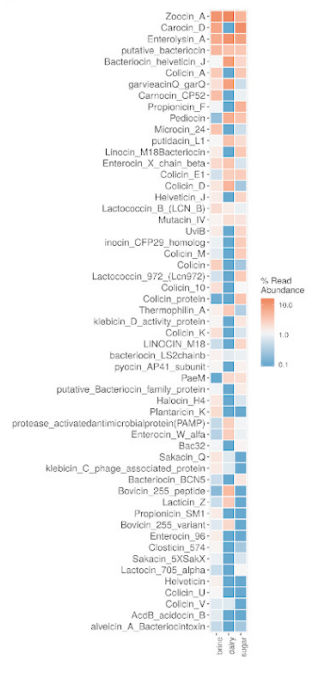

C)

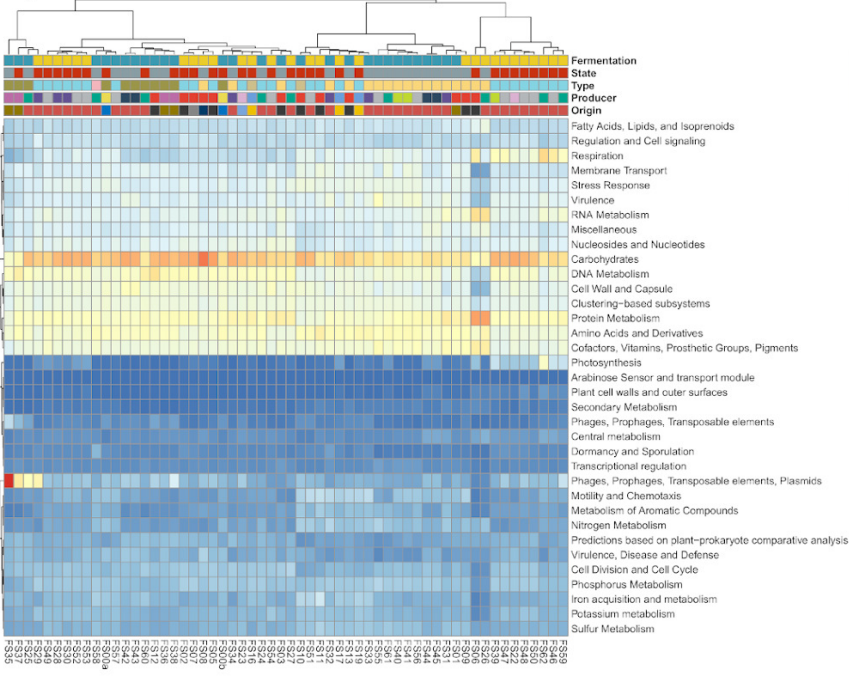

D)

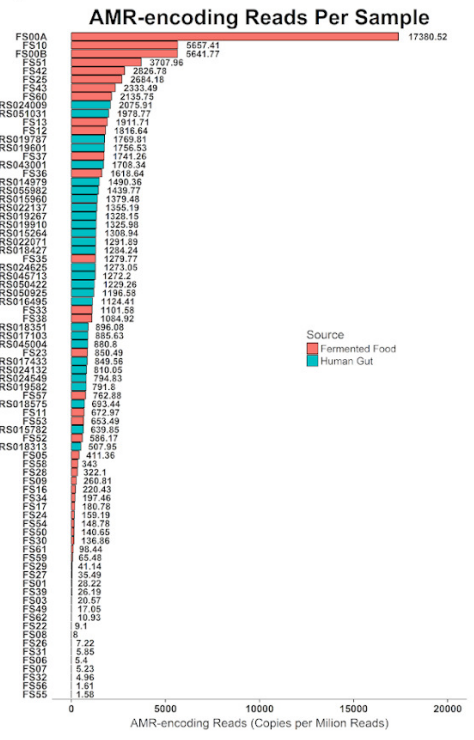



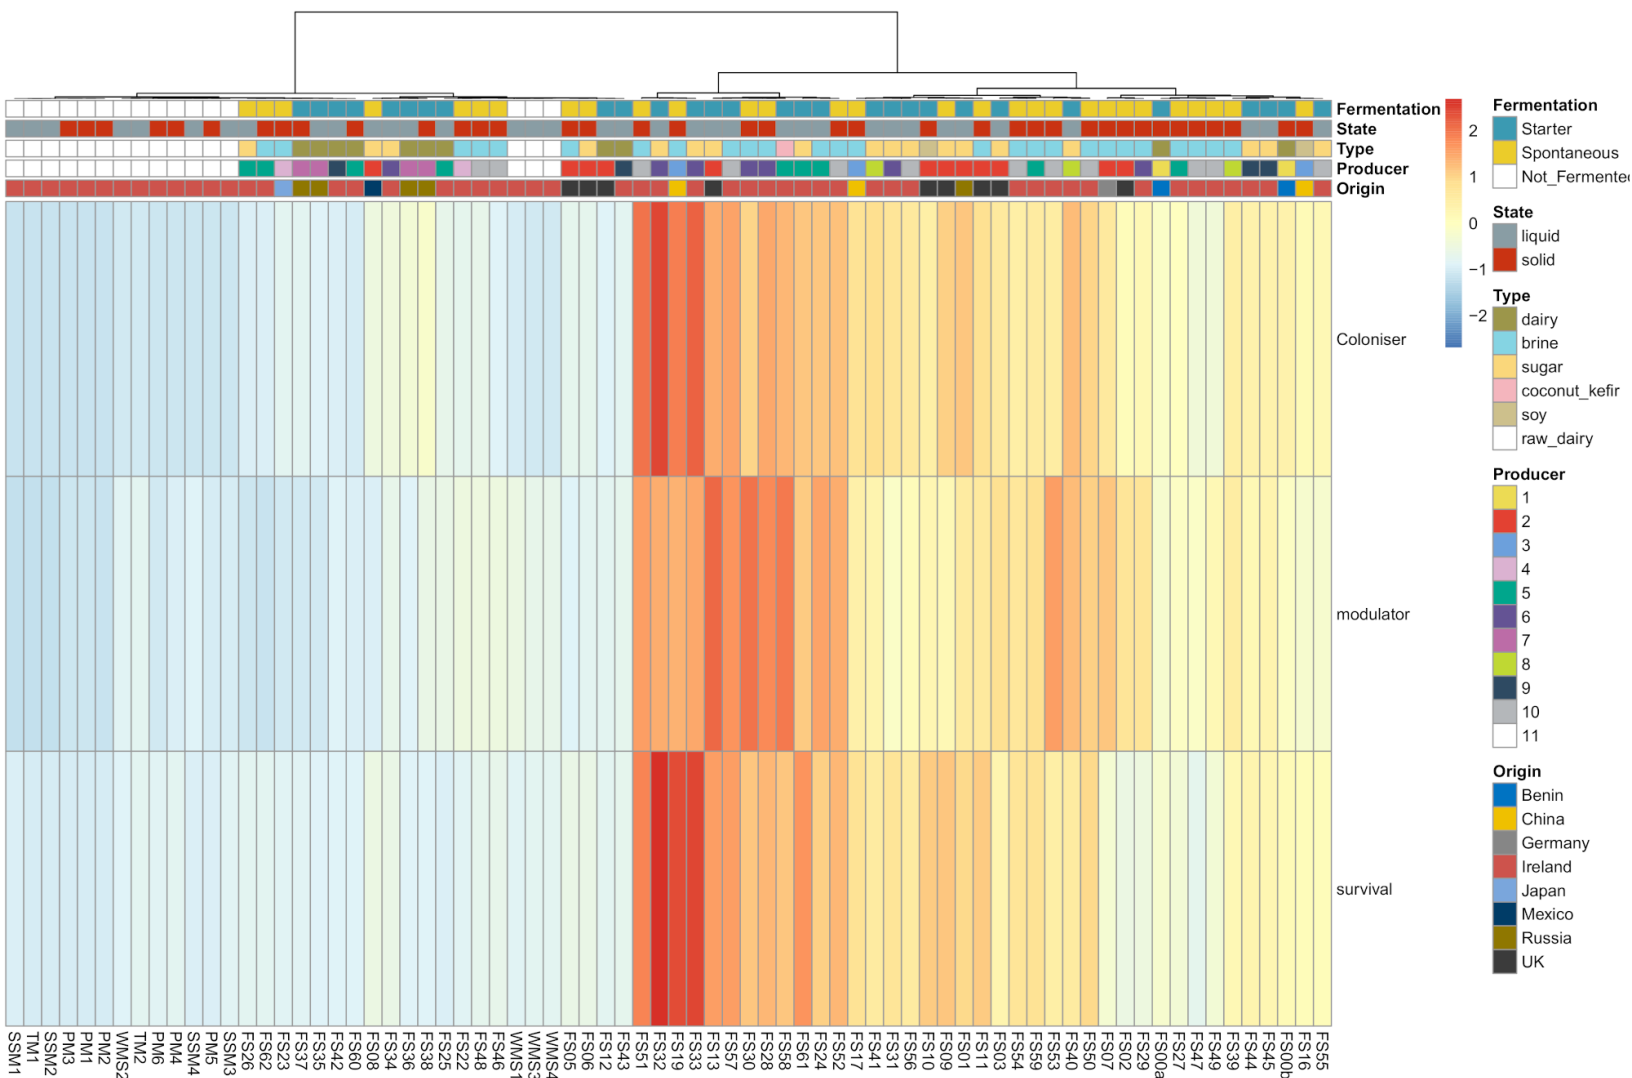

A)

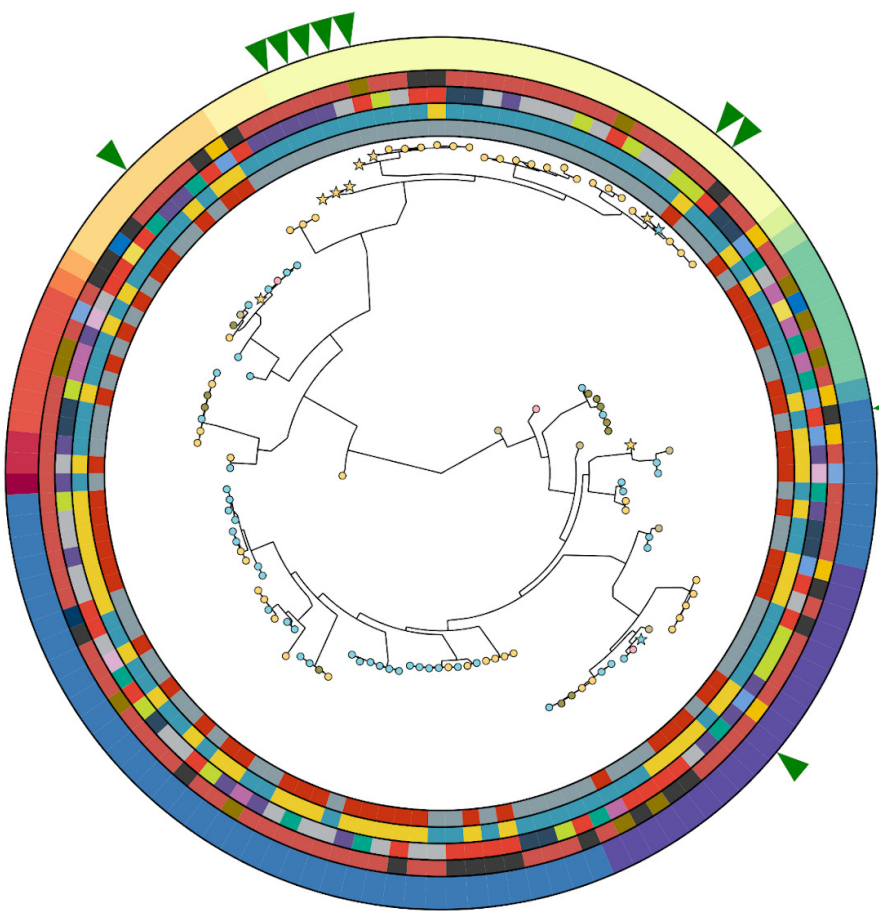

B)

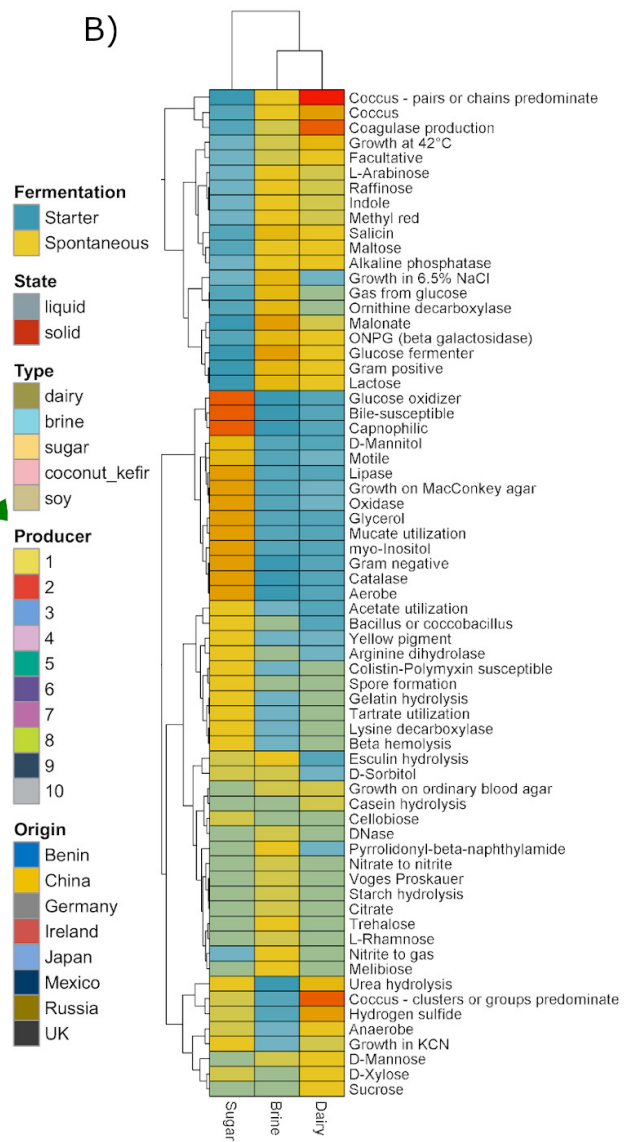

**Fermentation**

- Starter
- Spontaneous

**State**

- liquid
- solid

**Type**

- dairy
- brine
- sugar
- coconut\_kefir
- soy

**Producer**

- 1
- 2
- 3
- 4
- 5
- 6
- 7
- 8
- 9
- 10

**Origin**

- Benin
- China
- Germany
- Ireland
- Japan
- Mexico
- Russia
- UK

| Sample ID         | Origin  | Producer | Type     | State  | Fermentation |
|-------------------|---------|----------|----------|--------|--------------|
| Wagashi Ri FS00a  | Benin   |          | 1 dairy  | solid  | Starter      |
| Wagashi C FS00b   | Benin   |          | 1 dairy  | solid  | Starter      |
| Bread Kvas FS01   | Russia  |          | 2 sugar  | liquid | Starter      |
| Carrot Kimi FS02  | UK      |          | 2 brine  | solid  | Spontaneous  |
| Boza FS03         | UK      |          | 2 sugar  | liquid | Starter      |
| Turnip FS05       | UK      |          | 2 brine  | solid  | Spontaneous  |
| Orange FS06       | UK      |          | 2 sugar  | solid  | Spontaneous  |
| Krauthehi ( FS07  | Germany |          | 2 brine  | solid  | Spontaneous  |
| Tepache FS08      | Mexico  |          | 2 sugar  | liquid | Spontaneous  |
| Ginger Bee FS09   | UK      |          | 2 sugar  | liquid | Spontaneous  |
| Tempeh FS10       | UK      |          | 2 soy    | solid  | Starter      |
| Cucumber FS11     | UK      |          | 2 brine  | solid  | Spontaneous  |
| Milk Kefir FS12   | UK      |          | 2 dairy  | liquid | Starter      |
| Water Kefir FS13  | UK      |          | 2 sugar  | liquid | Starter      |
| Tofu Chilli FS16  | China   |          | 3 soy    | solid  | Spontaneous  |
| Daikon FS17       | China   |          | 3 brine  | solid  | Spontaneous  |
| Pickled veg FS19  | China   |          | 3 brine  | solid  | Spontaneous  |
| Raw Sauerl FS22   | Ireland |          | 4 brine  | solid  | Spontaneous  |
| Brown rice FS23   | Japan   |          | 4 brine  | solid  | Spontaneous  |
| Beetroot K FS24   | Ireland |          | 5 brine  | liquid | Starter      |
| Kefir and f FS25  | Ireland |          | 5 dairy  | liquid | Starter      |
| Mead FS26         | Ireland |          | 5 sugar  | liquid | Spontaneous  |
| Sauerkraut FS27   | Ireland |          | 5 brine  | solid  | Spontaneous  |
| Dill dearg ( FS28 | Ireland |          | 6 brine  | solid  | Spontaneous  |
| Kimchi FS29       | Ireland |          | 6 brine  | solid  | Spontaneous  |
| Golden chil FS30  | Ireland |          | 6 brine  | solid  | Spontaneous  |
| Water Kefir FS31  | Ireland |          | 6 sugar  | liquid | Starter      |
| Water Kefir FS32  | Ireland |          | 6 sugar  | liquid | Starter      |
| Water Kefir FS33  | Ireland |          | 6 sugar  | liquid | Starter      |
| Kombucha FS34     | Ireland |          | 6 sugar  | liquid | Starter      |
| RYAZHENK. FS35    | Russia  |          | 7 dairy  | liquid | Starter      |
| Agousha FS36      | Russia  |          | 7 dairy  | liquid | Starter      |
| ROSTAGRC FS37     | Russia  |          | 7 dairy  | solid  | Starter      |
| RUŽ'A FS38        | Russia  |          | 7 dairy  | solid  | Starter      |
| Sauerkraut FS39   | Ireland |          | 8 brine  | solid  | Spontaneous  |
| Kombucha FS40     | Ireland |          | 8 sugar  | liquid | Starter      |
| Apple Cide FS41   | Ireland |          | 8 sugar  | liquid | Starter      |
| Raw Milk K FS42   | Ireland |          | 9 dairy  | liquid | Starter      |
| Pasteurised FS43  | Ireland |          | 9 dairy  | liquid | Starter      |
| Water Kefir FS44  | Ireland |          | 9 sugar  | liquid | Starter      |
| Water Kefir FS45  | Ireland |          | 9 sugar  | liquid | Starter      |
| Dilly Carrot FS46 | Ireland |          | 10 brine | solid  | Spontaneous  |
| Brussel Spr FS47  | Ireland |          | 10 brine | solid  | Spontaneous  |
| Kimchi FS48       | Ireland |          | 10 brine | solid  | Spontaneous  |

|                        |         |                 |        |             |
|------------------------|---------|-----------------|--------|-------------|
| Garlic Kraut FS49      | Ireland | 10 brine        | solid  | Spontaneous |
| Dukkah Kraut FS50      | Ireland | 10 brine        | solid  | Spontaneous |
| Ginger Slices FS51     | Ireland | 10 brine        | solid  | Spontaneous |
| Daikon Radish FS52     | Ireland | 10 brine        | solid  | Spontaneous |
| Okra in 2% FS53        | Ireland | 10 brine        | solid  | Spontaneous |
| Tomatoes in brine FS54 | Ireland | 10 brine        | solid  | Spontaneous |
| Kombucha FS55          | Ireland | 10 sugar        | liquid | Starter     |
| Cherry Water FS56      | Ireland | 10 sugar        | liquid | Starter     |
| Beet Kvass FS57        | Ireland | 10 brine        | liquid | Starter     |
| Coconut Kefir FS58     | Ireland | 5 coconut_kefir | liquid | Starter     |
| Carrot sticks FS59     | Ireland | 5 brine         | solid  | Spontaneous |
| Labneh FS60            | Ireland | 5 dairy         | solid  | Starter     |
| Lemon and Honey FS61   | Ireland | 5 sugar         | liquid | Starter     |
| Scallion Kimchi FS62   | Ireland | 5 brine         | solid  | Spontaneous |

| level       | Variable   | P.Value | R.statistic | BH.padj  |
|-------------|------------|---------|-------------|----------|
| Family      | Type       | 0.001   | 0.651257    | 0.008333 |
| Genus       | Type       | 0.001   | 0.550893    | 0.0125   |
| Carbs       | Type       | 0.001   | 0.513851    | 0.003846 |
| Species     | Type       | 0.001   | 0.435899    | 0.05     |
| Superfocus  | Type       | 0.001   | 0.345232    | 0.004167 |
| Superfocus  | Type       | 0.001   | 0.288954    | 0.005    |
| Phylum      | Type       | 0.001   | 0.280196    | 0.005556 |
| Carbs       | Producer   | 0.001   | 0.220924    | 0.003571 |
| Superfocus  | Type       | 0.001   | 0.209595    | 0.004545 |
| Family      | Fermentati | 0.001   | 0.202424    | 0.00625  |
| Species     | Fermentati | 0.001   | 0.171209    | 0.016667 |
| Species     | State      | 0.001   | 0.169026    | 0.025    |
| Family      | State      | 0.001   | 0.166545    | 0.007143 |
| AMR         | Type       | 0.004   | 0.162648    | 0.01     |
| Species     | Producer   | 0.003   | 0.160154    | 0.007895 |
| Carbs       | Fermentati | 0.001   | 0.154196    | 0.003333 |
| Genus       | Fermentati | 0.001   | 0.149069    | 0.01     |
| Superfocus  | State      | 0.002   | 0.11744     | 0.00625  |
| Superfocus  | Fermentati | 0.002   | 0.111461    | 0.005556 |
| AMR         | Fermentati | 0.005   | 0.105752    | 0.011905 |
| Genus       | State      | 0.007   | 0.09654     | 0.014583 |
| Superfocus  | State      | 0.006   | 0.094444    | 0.013043 |
| Superfocus  | Fermentati | 0.002   | 0.093142    | 0.005882 |
| Superfocus  | Fermentati | 0.006   | 0.080077    | 0.013636 |
| Superfocus  | State      | 0.012   | 0.076215    | 0.024    |
| Carbs       | State      | 0.019   | 0.072869    | 0.035185 |
| Bacteriocin | State      | 0.018   | 0.070108    | 0.034615 |

| Food        | Sample | Closest NCI Identity |
|-------------|--------|----------------------|
| Bread Kvas  | FS01   | Gluconoba 93.4228    |
| Raw Milk K  | FS41   | Acetobacte 86.3852   |
| Sauerkraut  | FS39   | Acetobacte 85.9458   |
| Boza        | FS03   | Lactobacilli 82.2453 |
| Water Kefir | FS32   | Rouxiella cl 81.3335 |
| Golden chil | FS30   | Leuconostc 81.0244   |
| Cherry Wat  | FS56   | Acetobacte 78.5186   |
| Water Kefir | FS31   | Acidisphae 78.4976   |
| Water Kefir | FS33   | Acidisphae 78.475    |
| Water Kefir | FS32   | Acidisphae 78.0727   |
